# Supplementary material for: Increased 3-O-sulfated heparan sulfate in Alzheimer’s disease brain is associated with genetic risk gene HS3ST1
Source: PubMed Central journal article supplement — Sci Adv. 2023 May 26;9(21):eadf6232. doi: 10.1126/sciadv.adf6232 (PMC10219595; doi:10.1126/sciadv.adf6232), 2023-05-26
Supplement: sciadv.adf6232_sm.pdf [file sciadv.adf6232_sm.pdf]

Supplementary Materials for  
**Increased 3-*O*-sulfated heparan sulfate in Alzheimer's disease brain is  
associated with genetic risk gene *HS3ST1***

Zhangjie Wang *et al.*

Corresponding author: Jian Liu, [jian\\_liu@unc.edu](mailto:jian_liu@unc.edu)

*Sci. Adv.* **9**, eadf6232 (2023)  
DOI: [10.1126/sciadv.adf6232](https://doi.org/10.1126/sciadv.adf6232)

**This PDF file includes:**

Figs. S1 to S13  
Tables S1 to S16

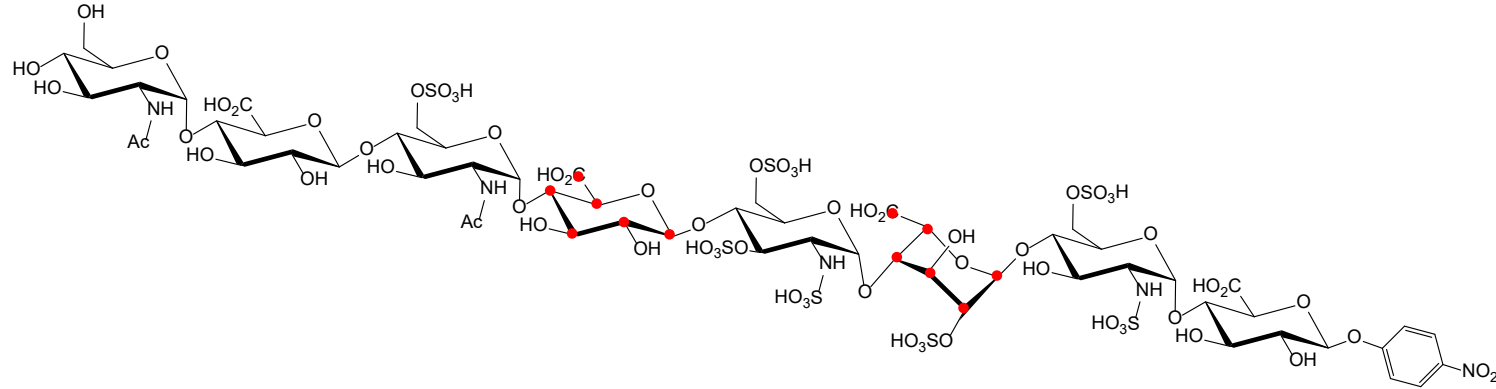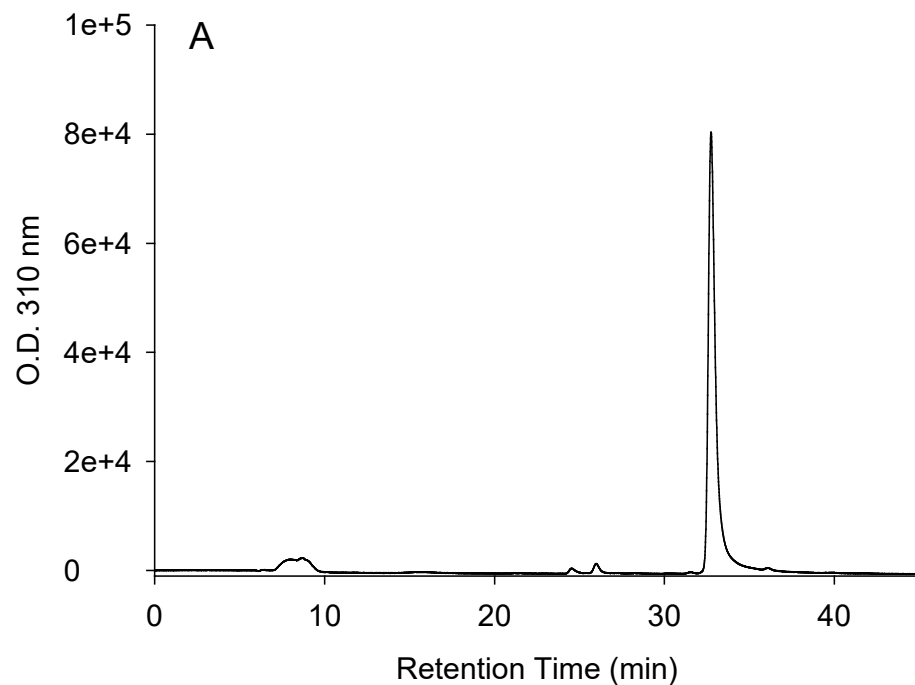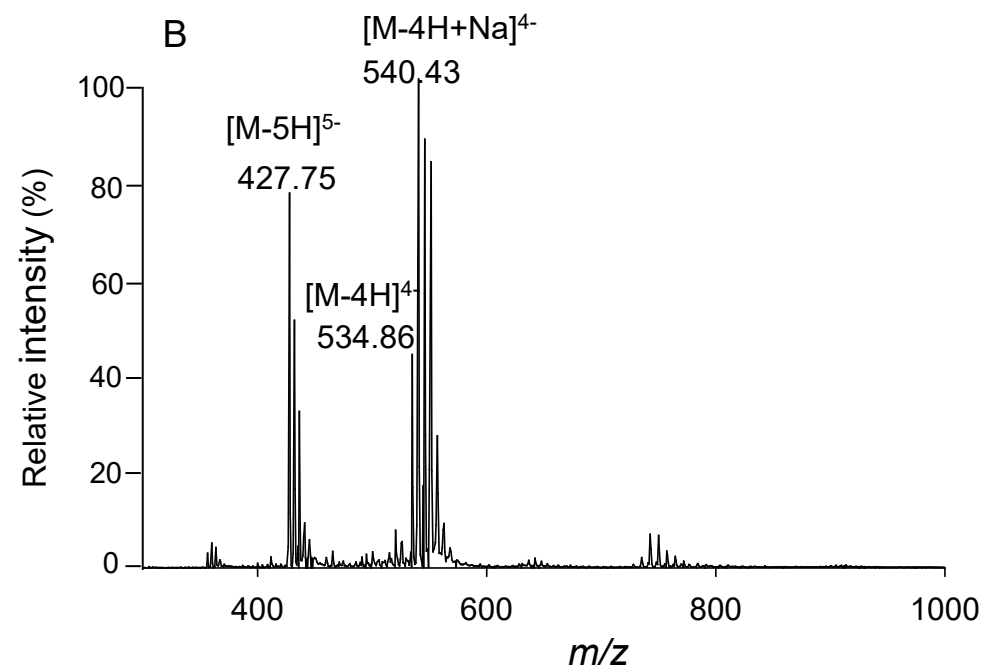

**Suppl Fig S1. Purity and structure analysis of  $^{13}\text{C}$ -labeled 8-mer-1 calibrant.** Panel A shows the SAX-HPLC chromatogram. Panel B shows the ESI-MS spectrum of  $^{13}\text{C}$ -labeled 8-mer-1 calibrant. The molecular ions carrying 4 and 5 negative charges with Na adduct are indicated. The structure is shown above. Red circles represent  $^{13}\text{C}$ -labeled sites.

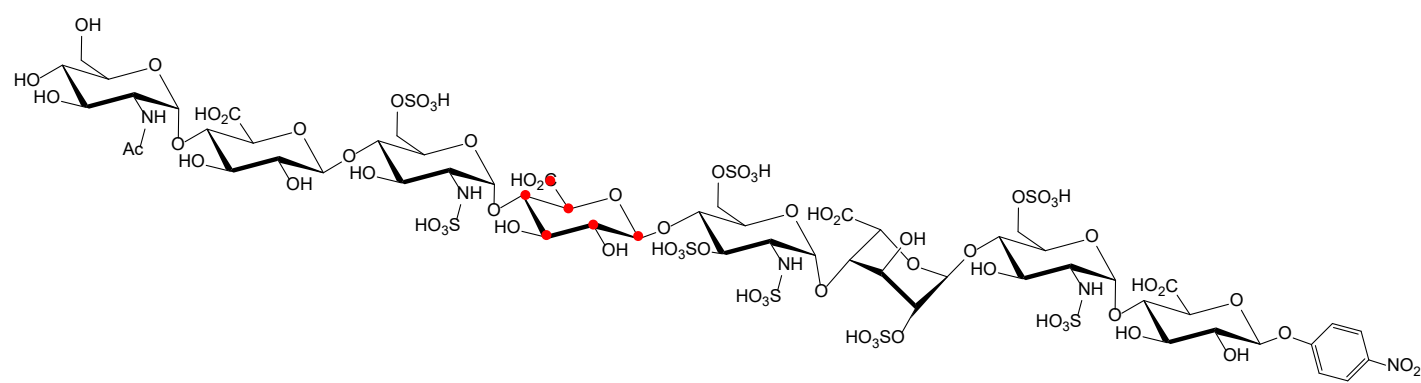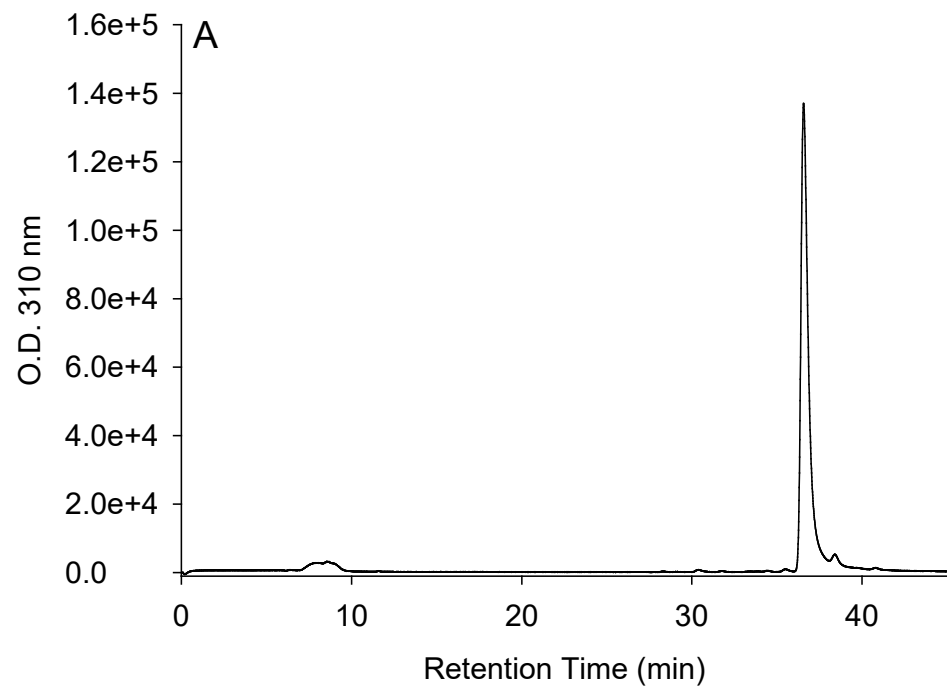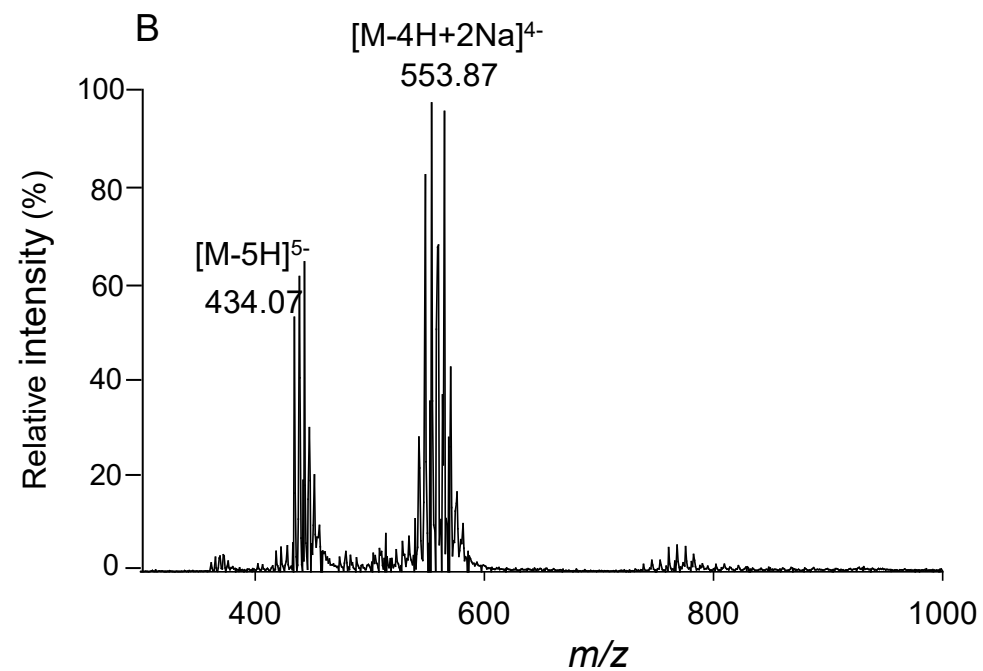

**Suppl Fig S2. Purity and structure analysis of  $^{13}\text{C}$ -labeled 8-mer-2 calibrant.** Panel A shows the SAX-HPLC chromatogram. Panel B shows the ESI-MS spectrum of  $^{13}\text{C}$ -labeled 8-mer-2 calibrant. The molecular ions carrying 4 and 5 negative charges with Na adduct are indicated. The structure is shown above. Red circles represent  $^{13}\text{C}$ -labeled sites.

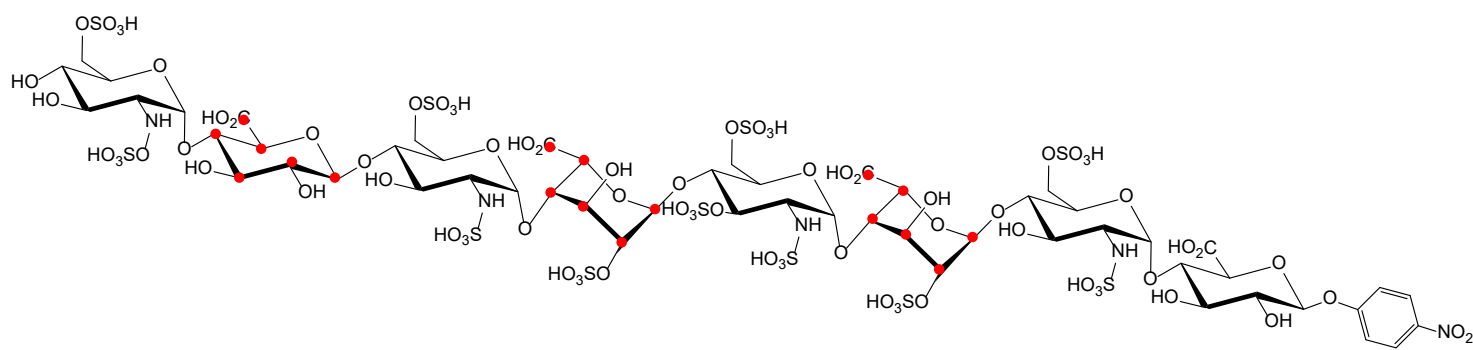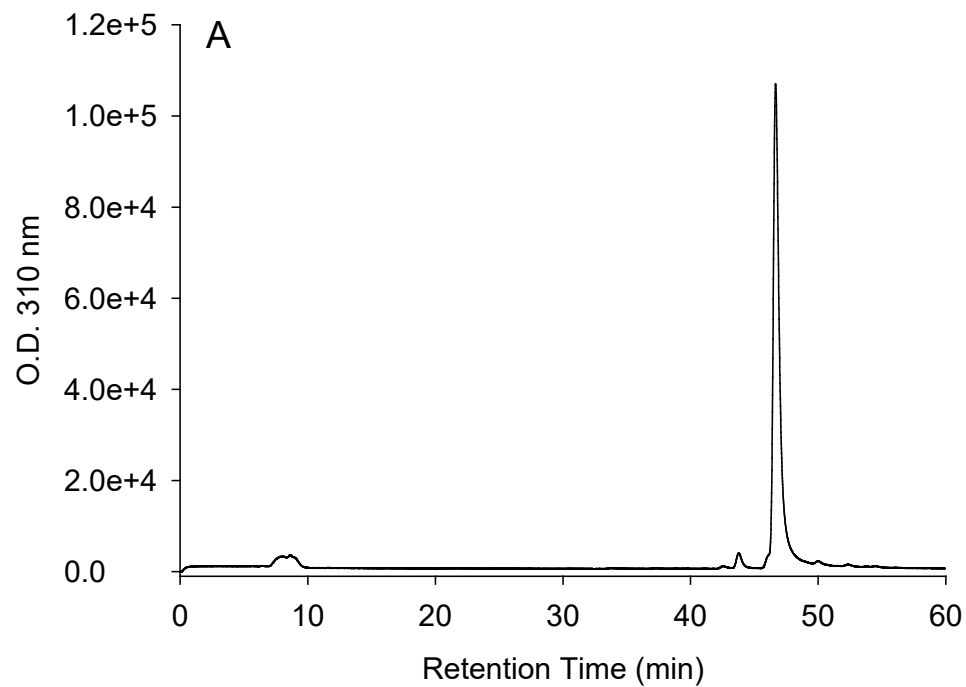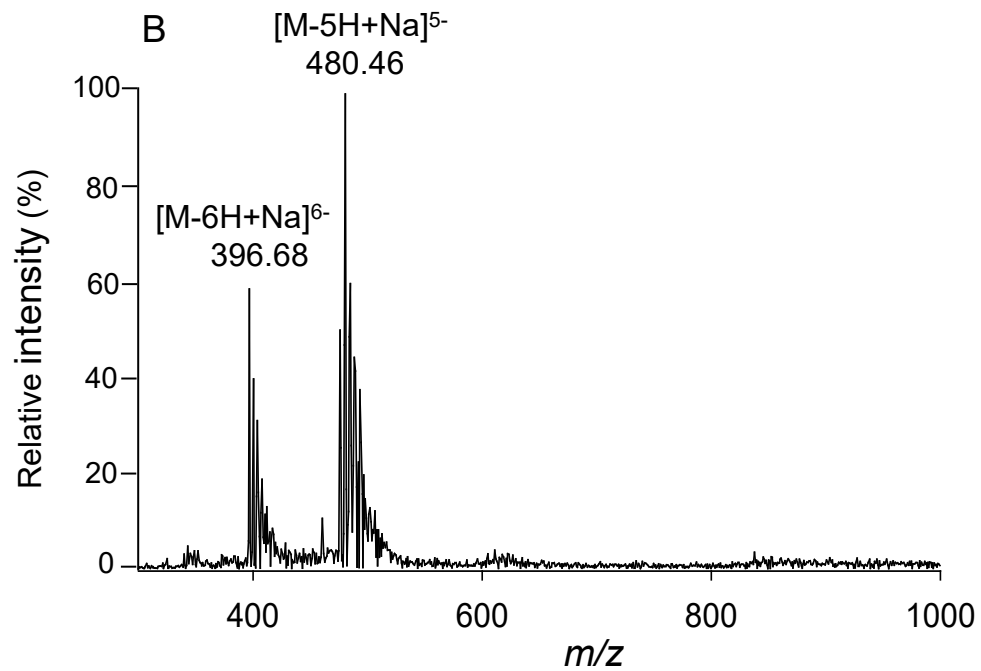

**Suppl Fig S3. Purity and structure analysis of <sup>13</sup>C-labeled 8-mer-3 calibrant.** Panel A shows the SAX-HPLC chromatogram. Panel B shows the ESI-MS spectrum of <sup>13</sup>C-labeled 8-mer-3 calibrant. The molecular ions carrying 5 and 6 negative charges with Na adduct are indicated. The structure is shown above. Red circles represent <sup>13</sup>C-labeled sites.

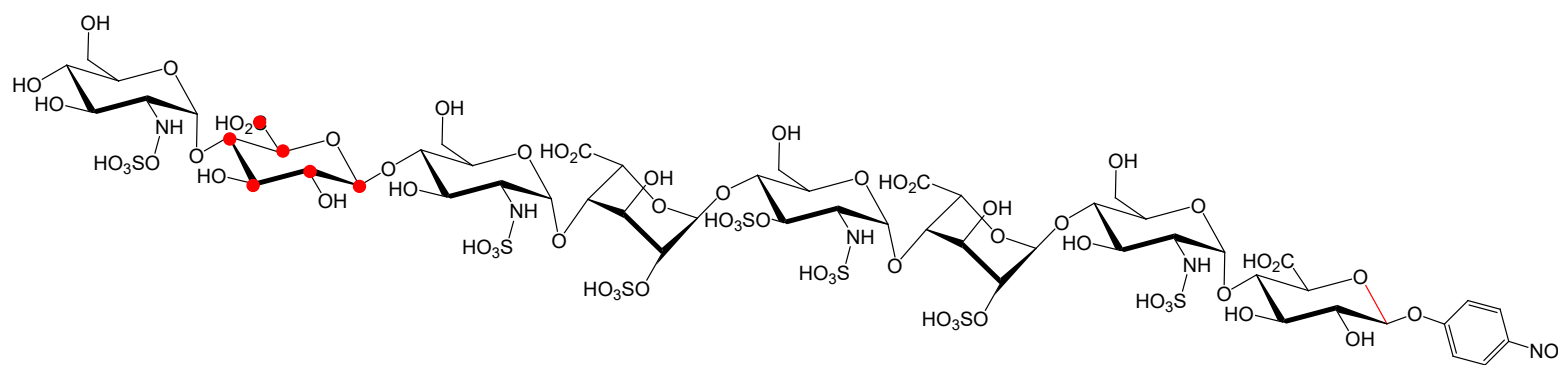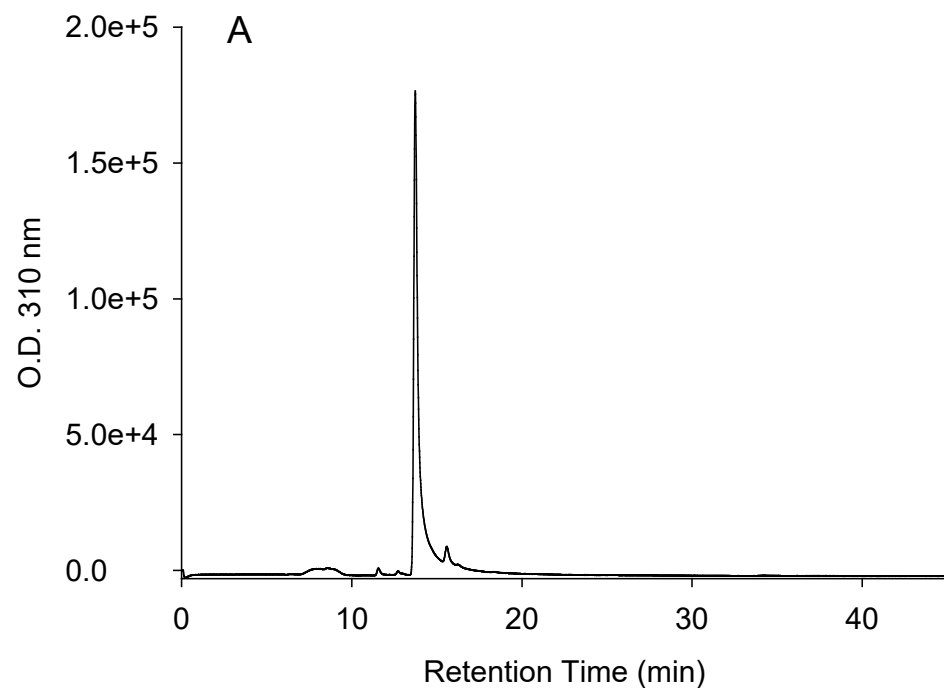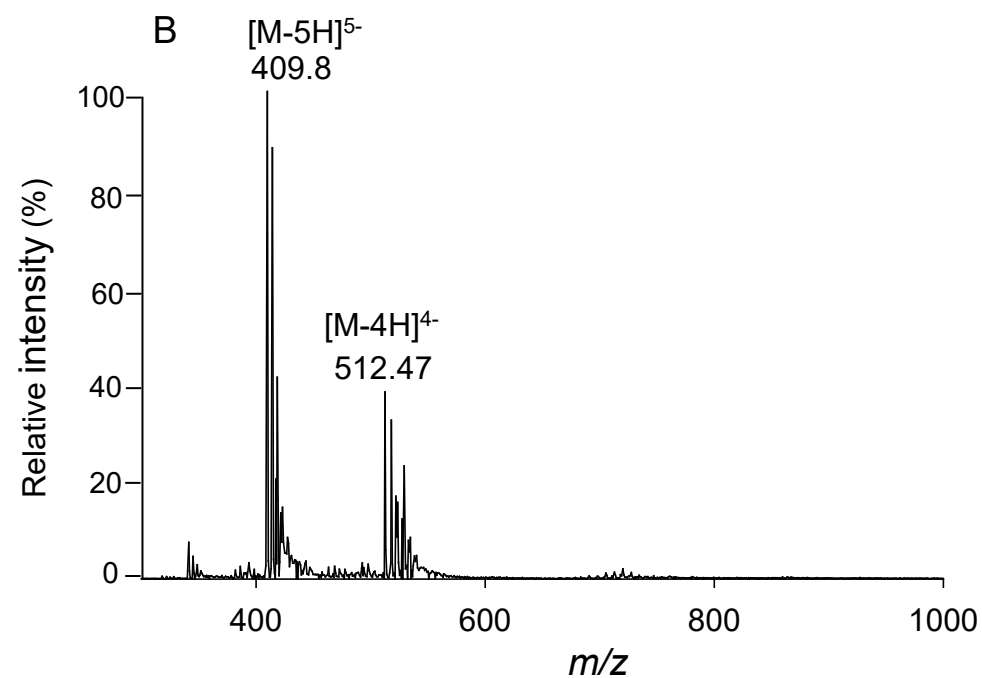

**Suppl Fig S4. Purity and structure analysis of  $^{13}\text{C}$ -labeled 8-mer-4 calibrant.** Panel A shows the SAX-HPLC chromatogram. Panel B shows the ESI-MS spectrum of  $^{13}\text{C}$ -labeled 8-mer calibrant 4. The molecular ions carrying 4 and 5 negative charges are indicated. The structure is shown above. Red circles represent  $^{13}\text{C}$ -labeled sites.

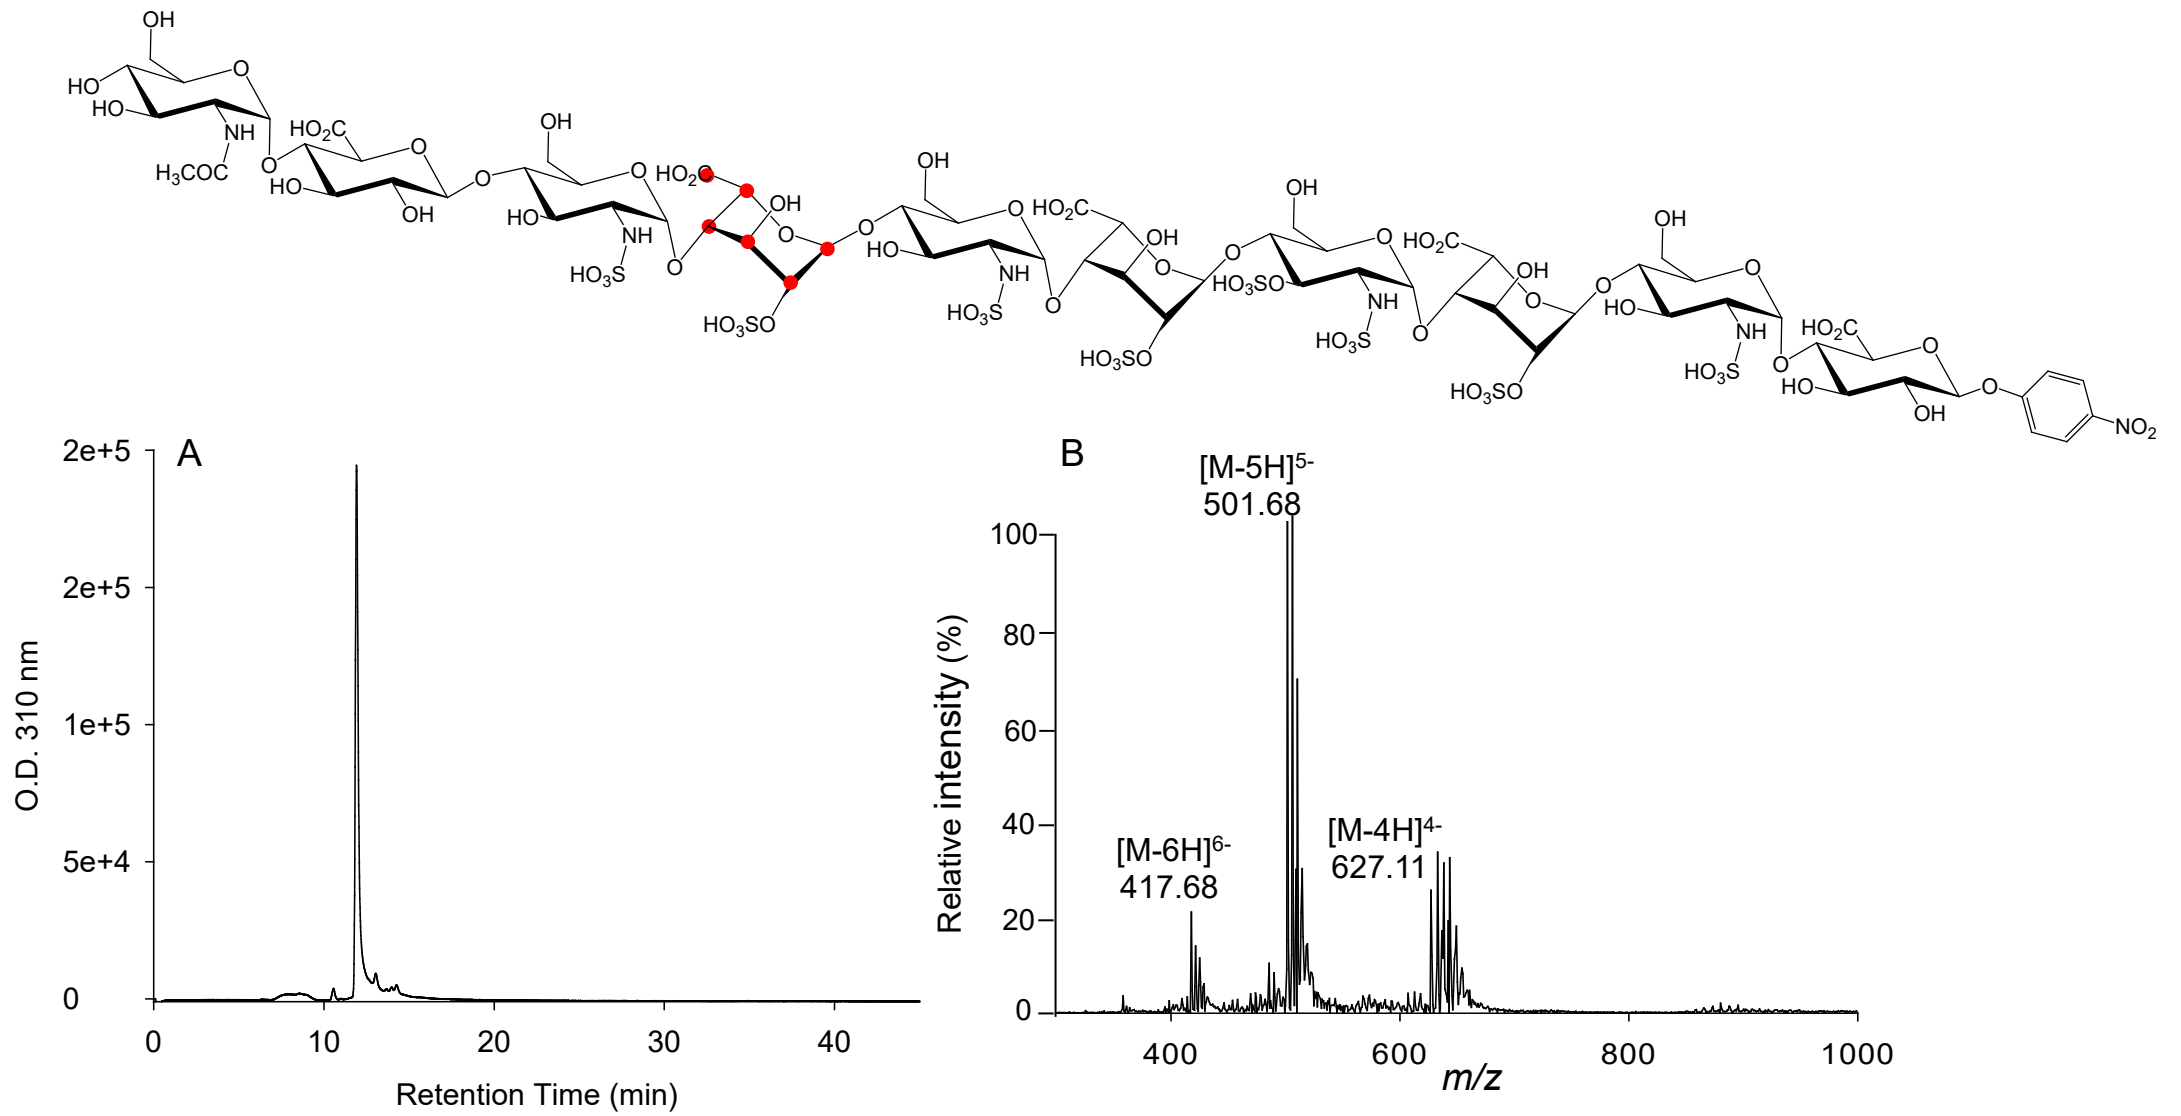

**Suppl Fig S5. Purity and structure analysis of <sup>13</sup>C-labeled 10-mer-5 calibrant.** Panel A shows the SAX-HPLC chromatogram. Panel B shows the ESI-MS spectrum of <sup>13</sup>C-labeled 10-mer-5 calibrant. The molecular ions carrying 4, 5 and 6 negative charges with Na adduct are indicated. The structure is shown above. Red circles represent <sup>13</sup>C-labeled sites.

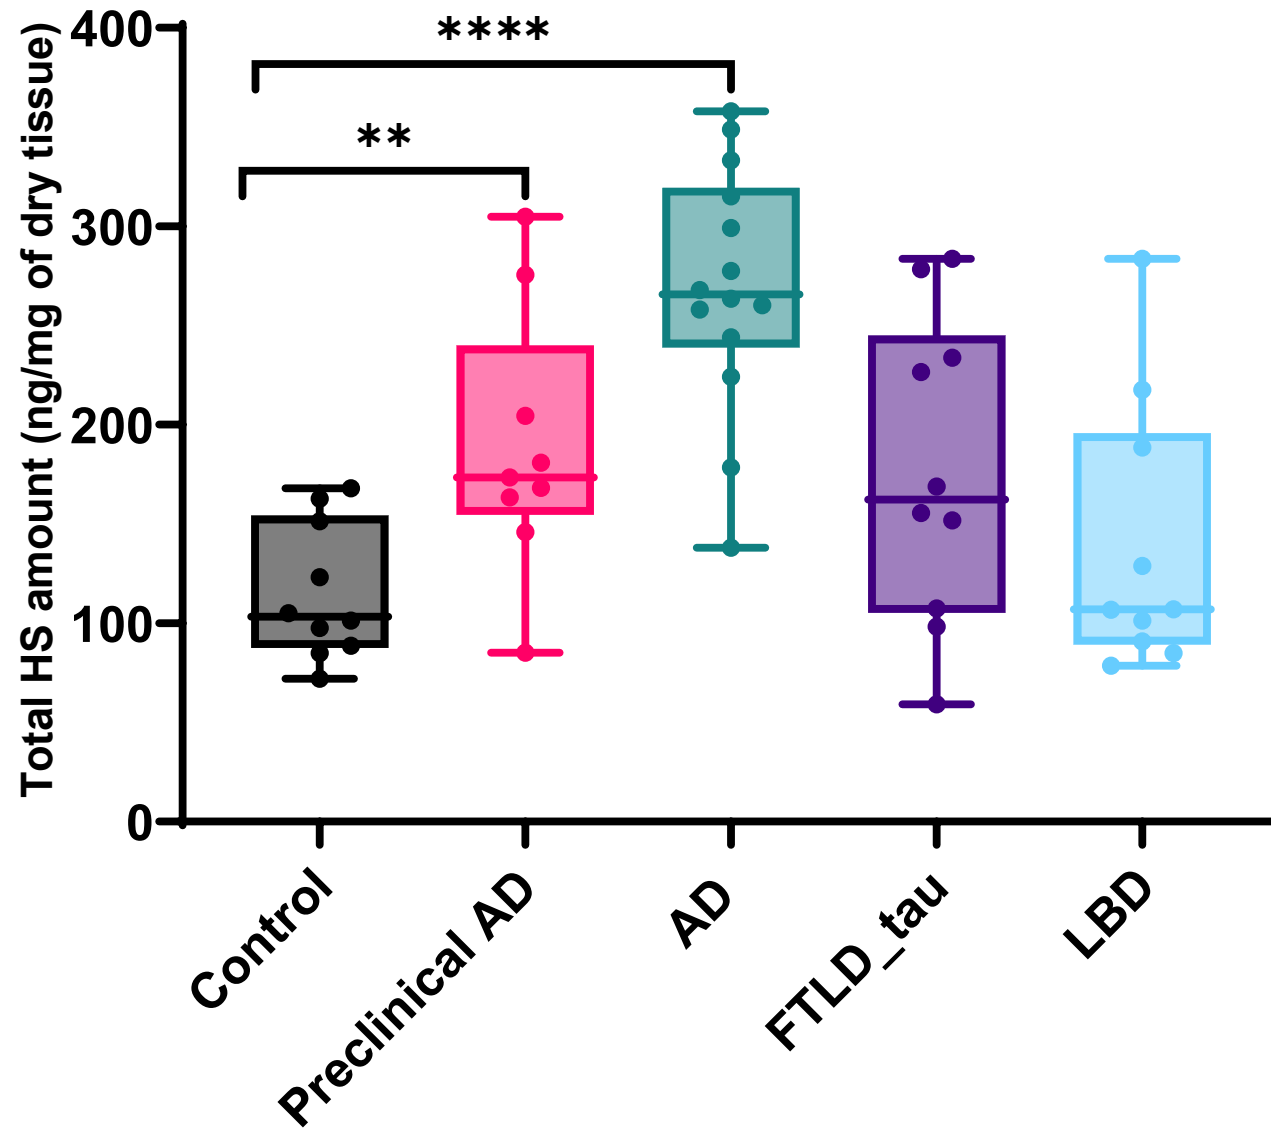

**Suppl Fig S6. The amount of total HS from human brain tissue with different neurodegenerative diseases.** The data are presented as mean  $\pm$  S.D. p value was determined by two tailed unpaired t test, \* $p < 0.05$ , \*\* $p < 0.01$ , \*\*\* $p < 0.001$  and \*\*\*\* $p < 0.0001$ .

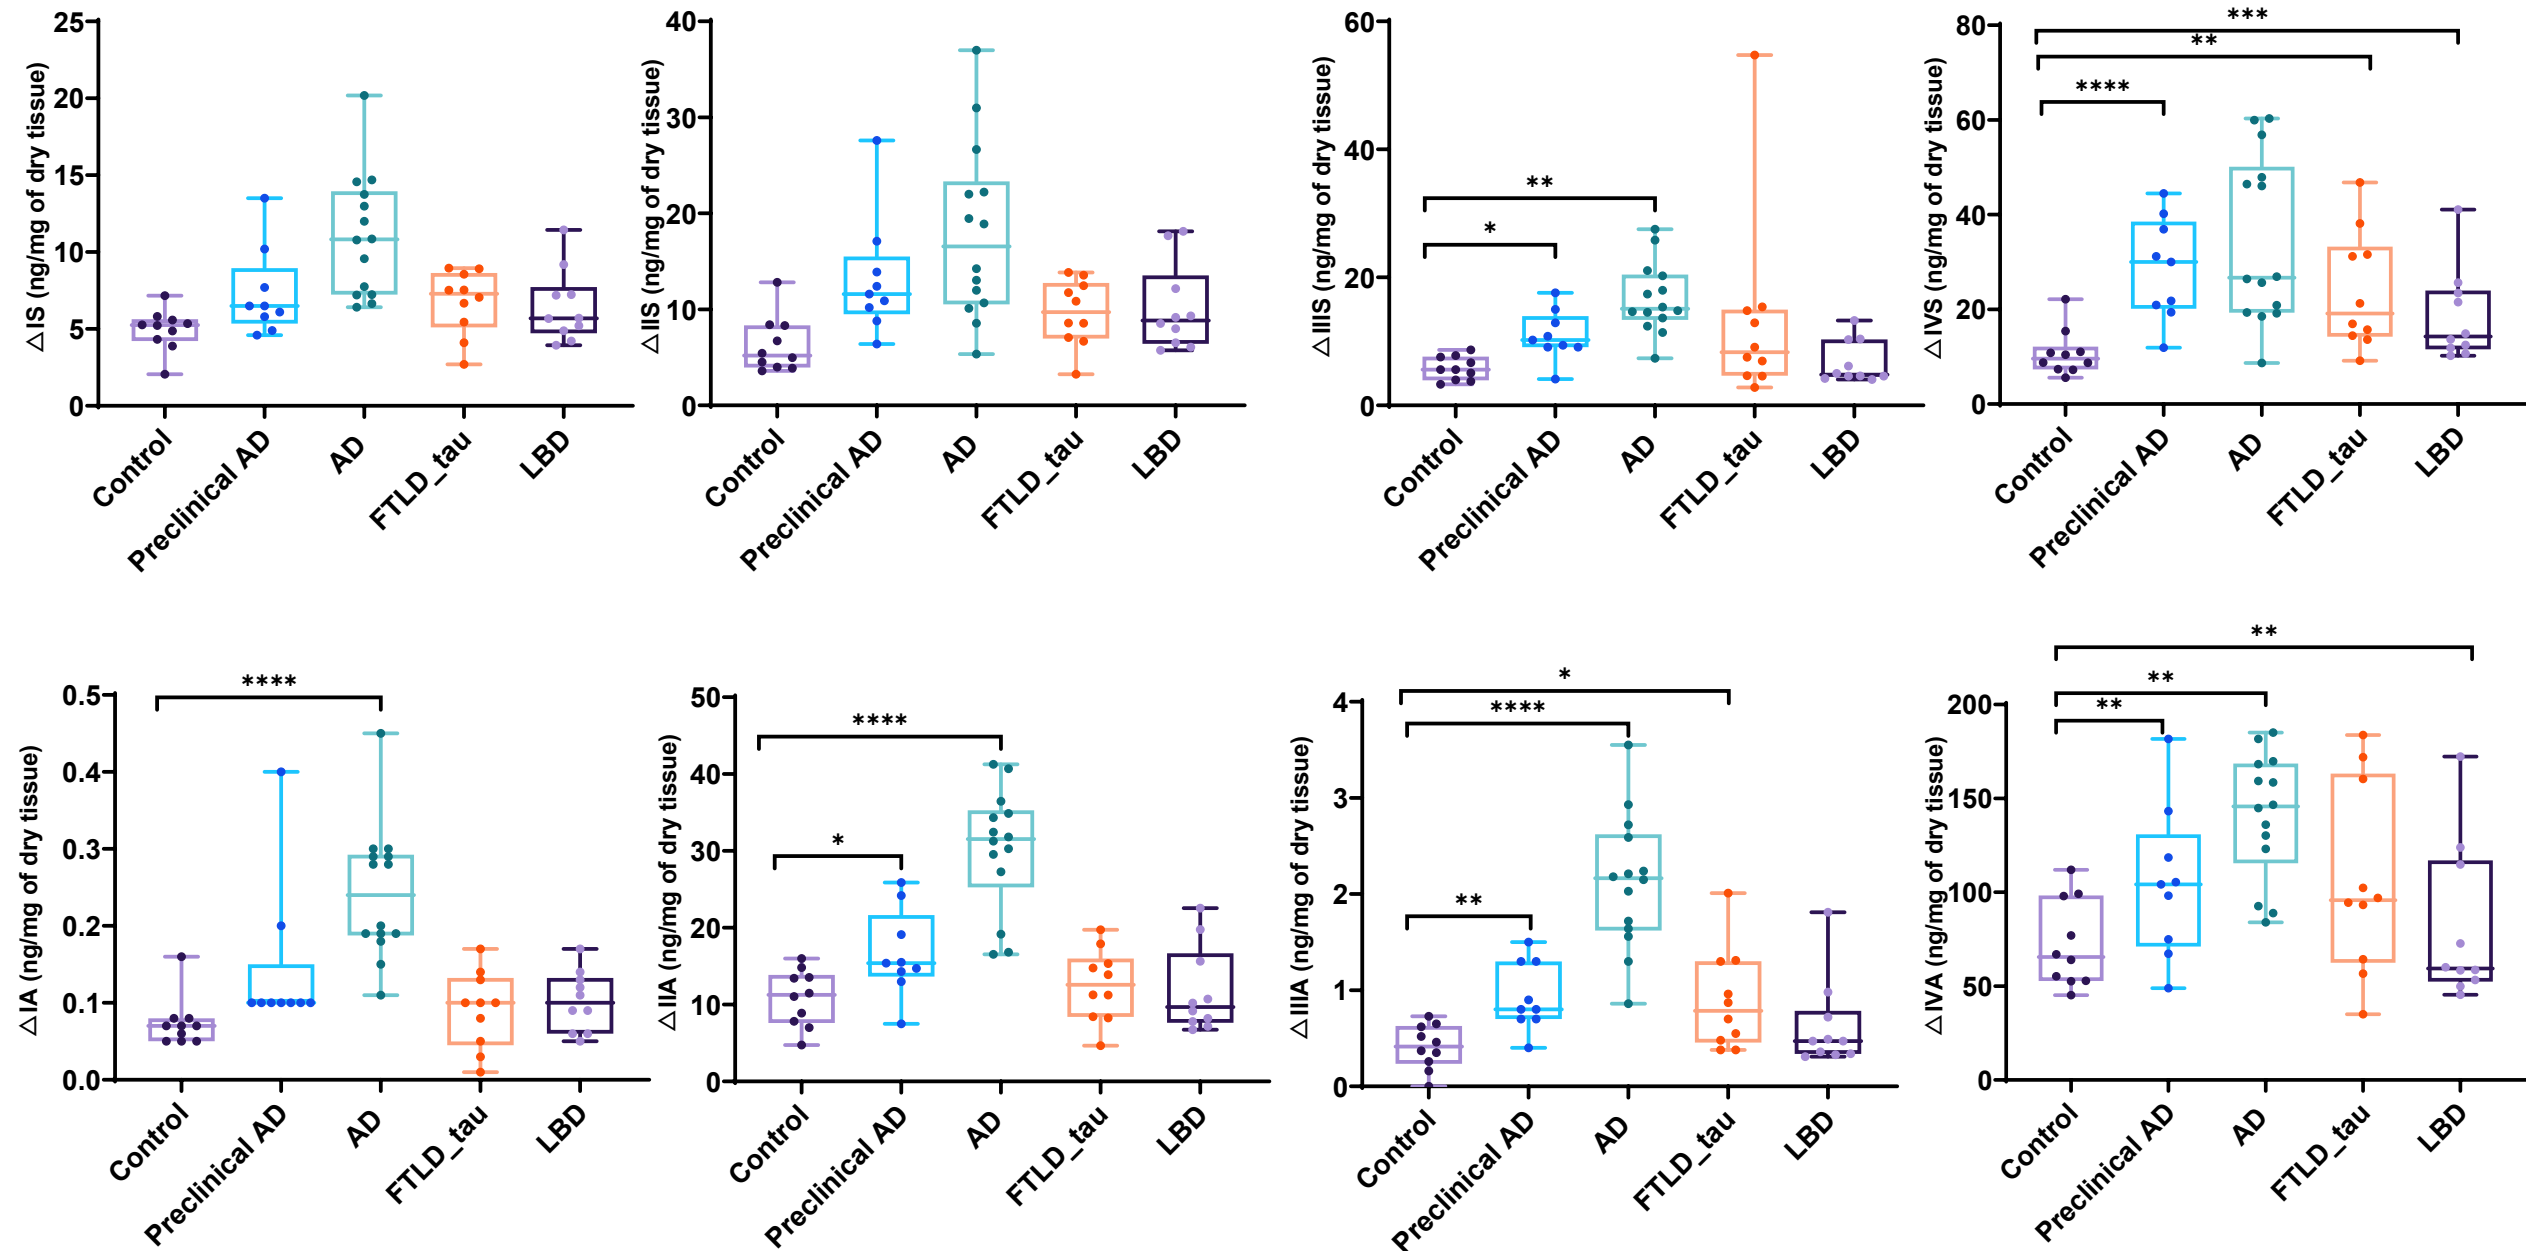

**Suppl Fig S7. The amount of individual disaccharide from human brain tissue with different neurodegenerative diseases.** The data are presented as mean ± S.D. p value was determined by two tailed unpaired t test, \*p < 0.05, \*\*p < 0.01, \*\*\*p < 0.001 and \*\*\*\*p < 0.0001.



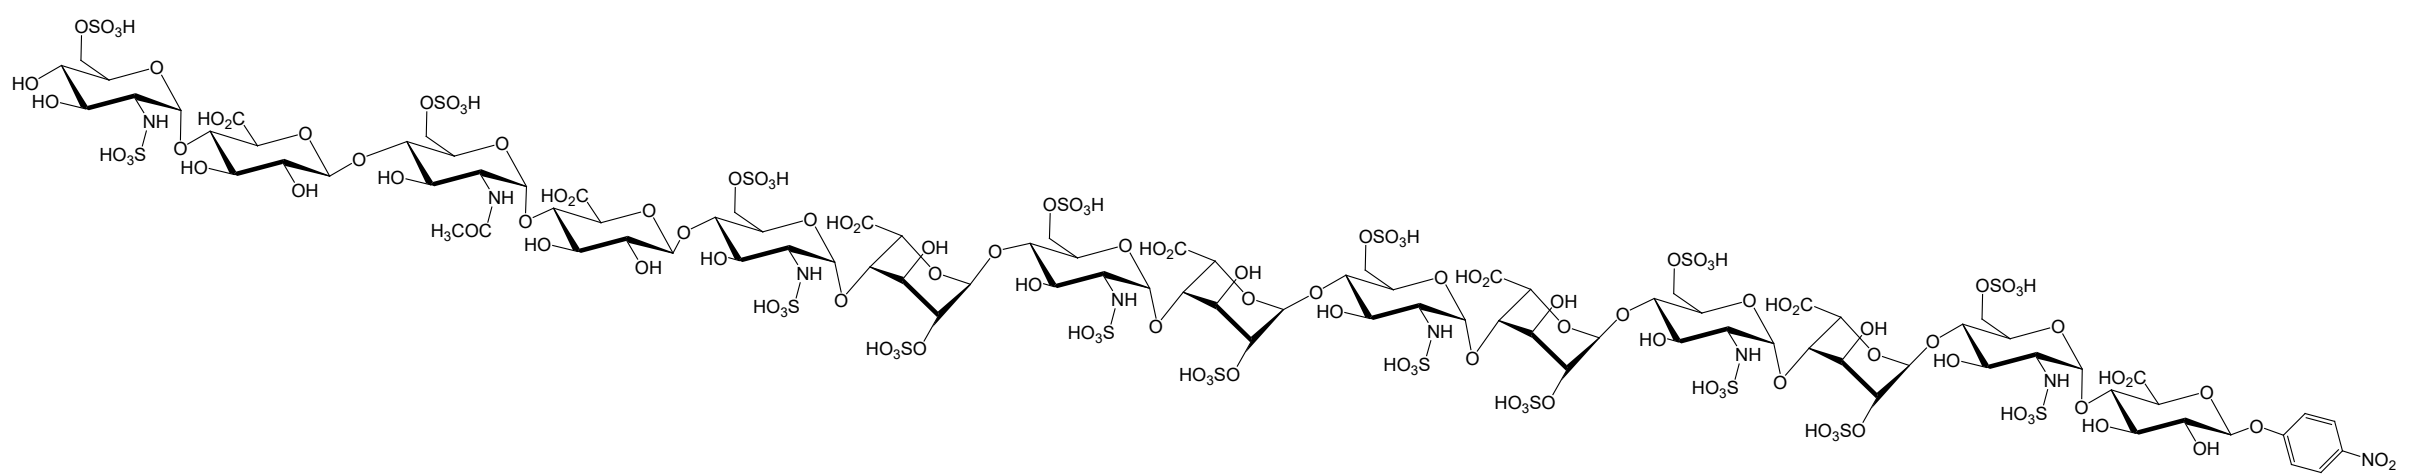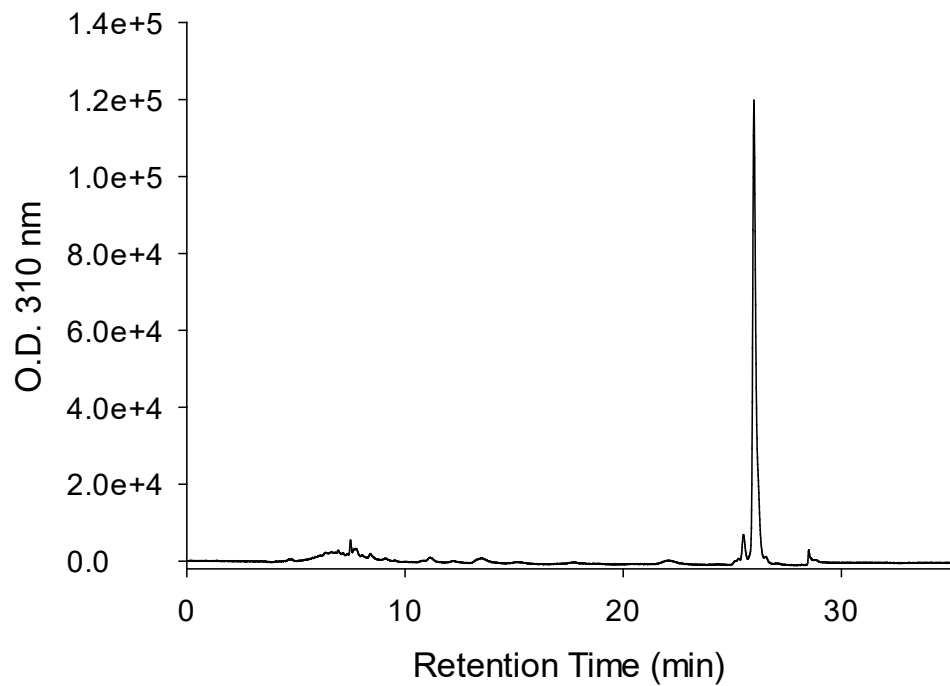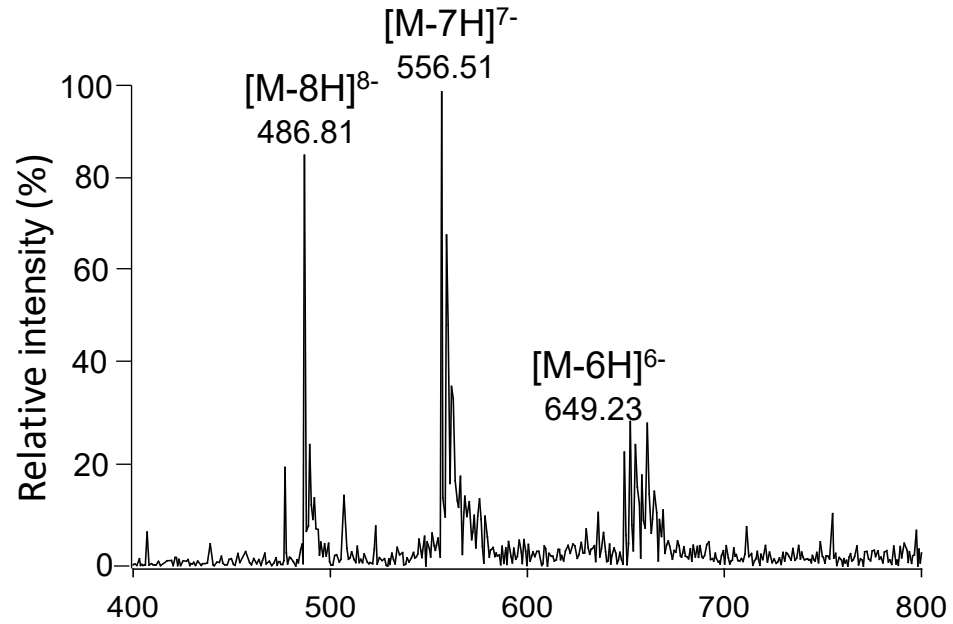

**Suppl Fig S8. Purity and structure analysis of 14-mer-1.** Panel A shows the SAX-HPLC chromatogram. Panel B shows the ESI-MS spectrum of 14mer-1. The molecular ions carrying 8, 7 and 6 negative charges with Na adduct are indicated. The structure is shown above.

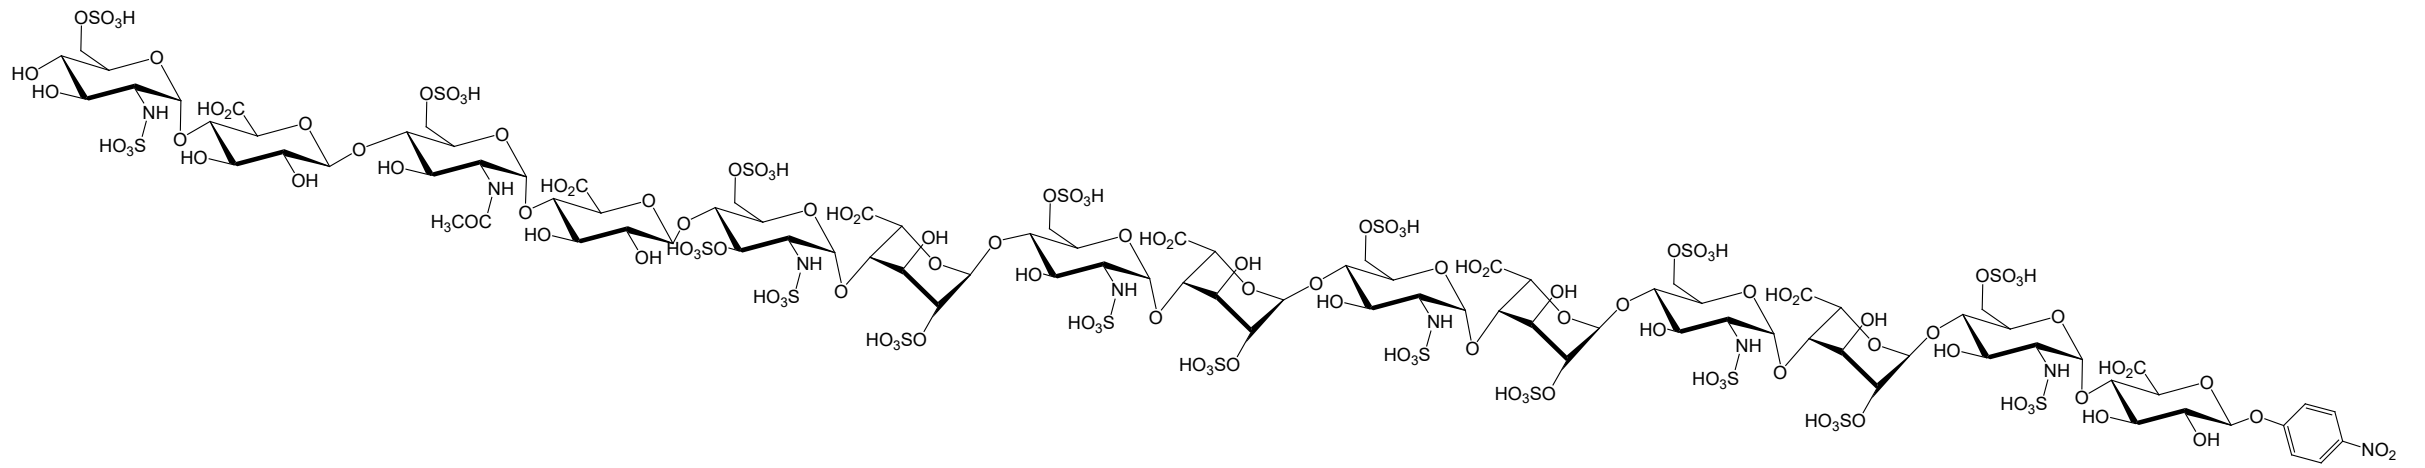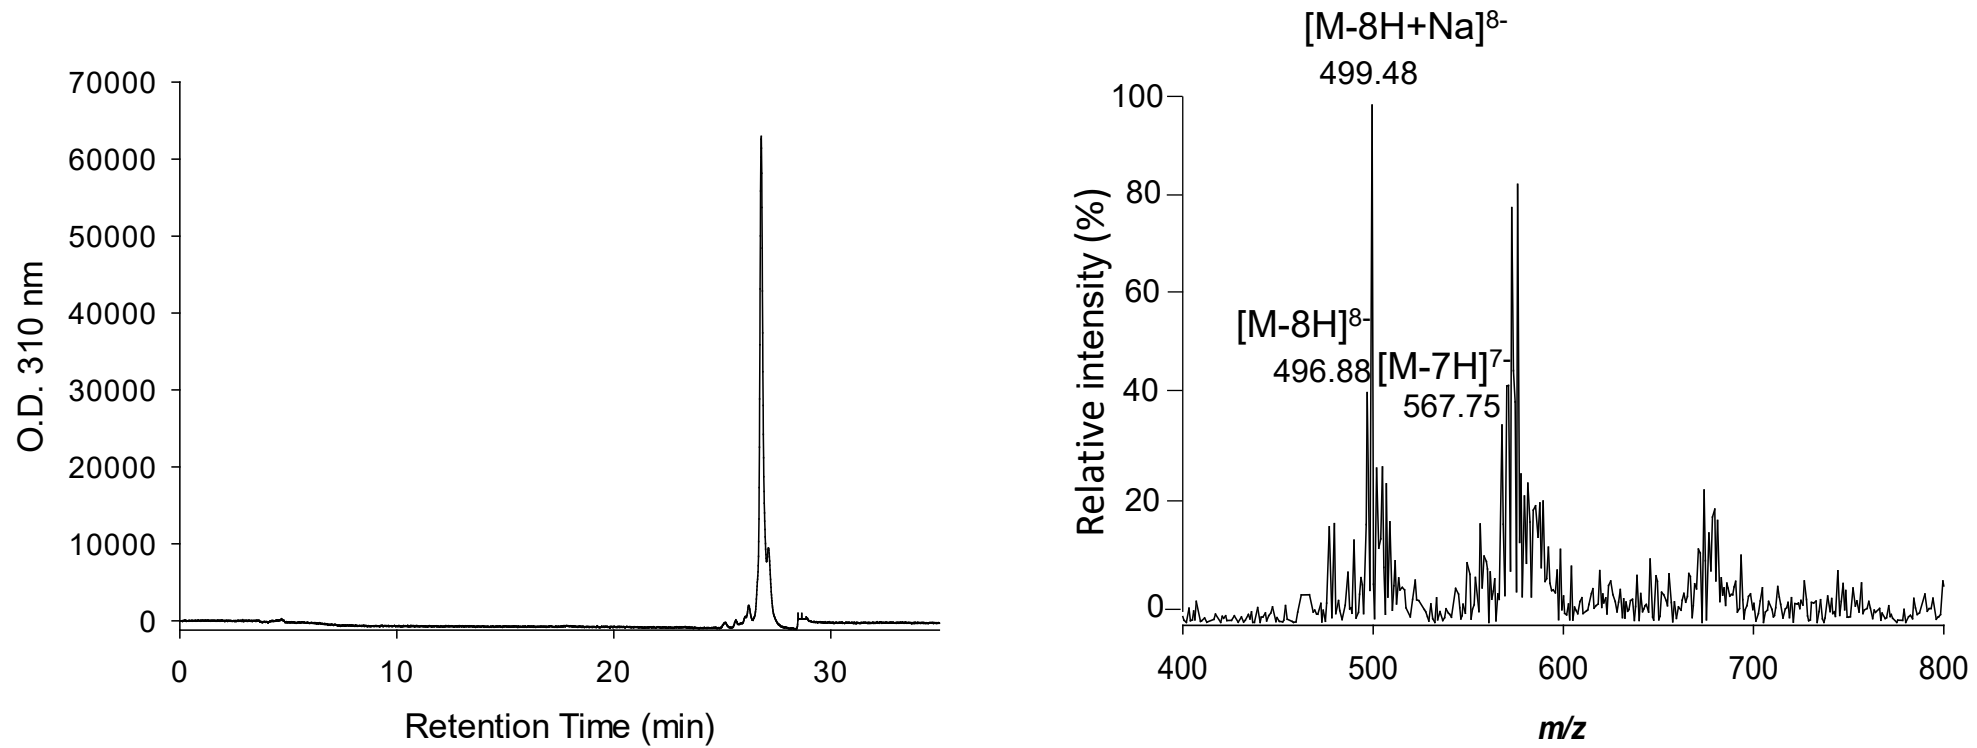

**Suppl Fig S9. Purity and structure analysis of 14-mer-2.** Panel A shows the SAX-HPLC chromatogram. Panel B shows the ESI-MS spectrum of 14mer-2. The molecular ions carrying 8 and 7 negative charges with Na adduct are indicated. The structure is shown above.

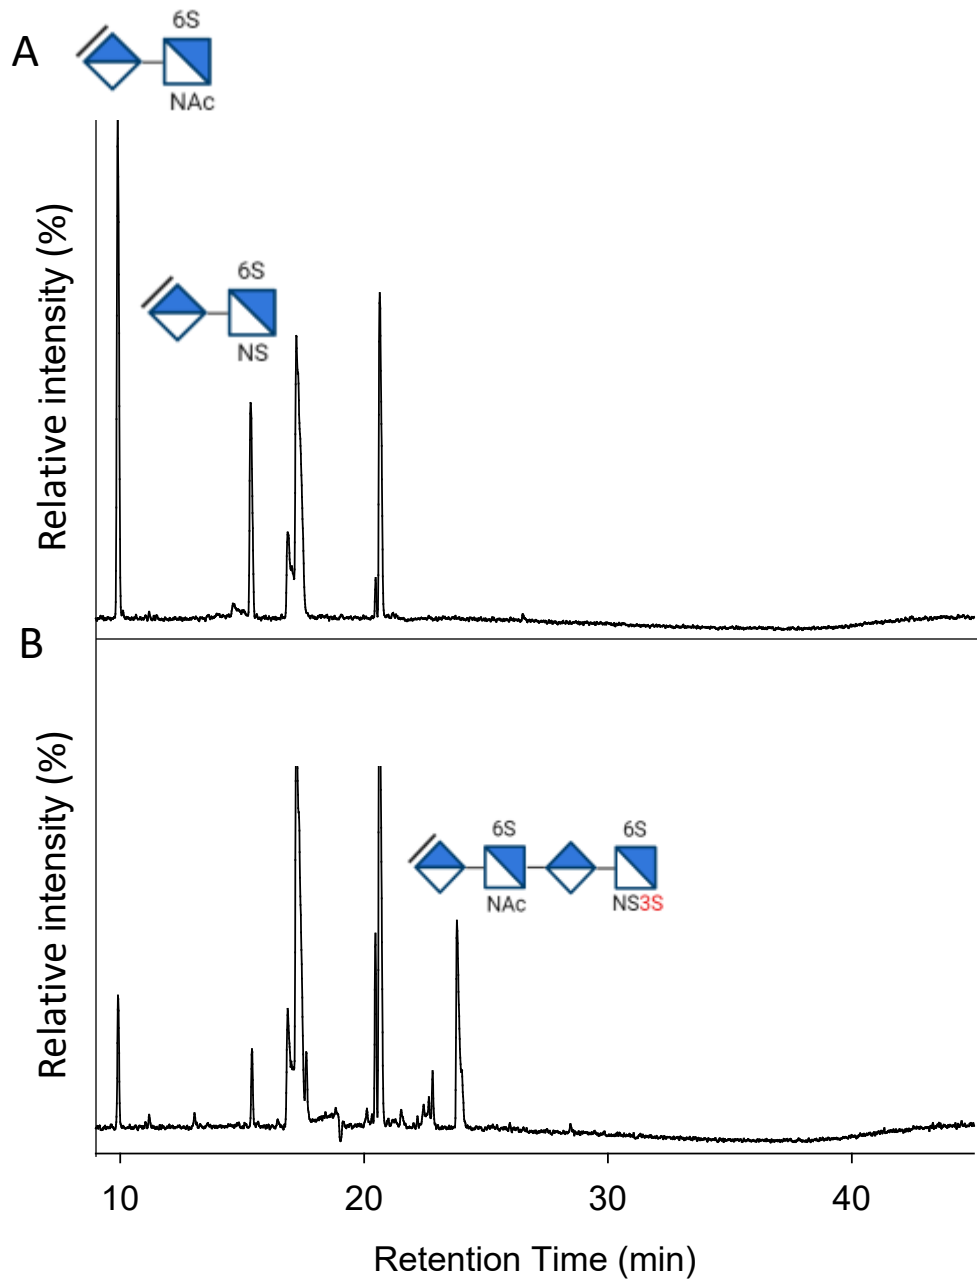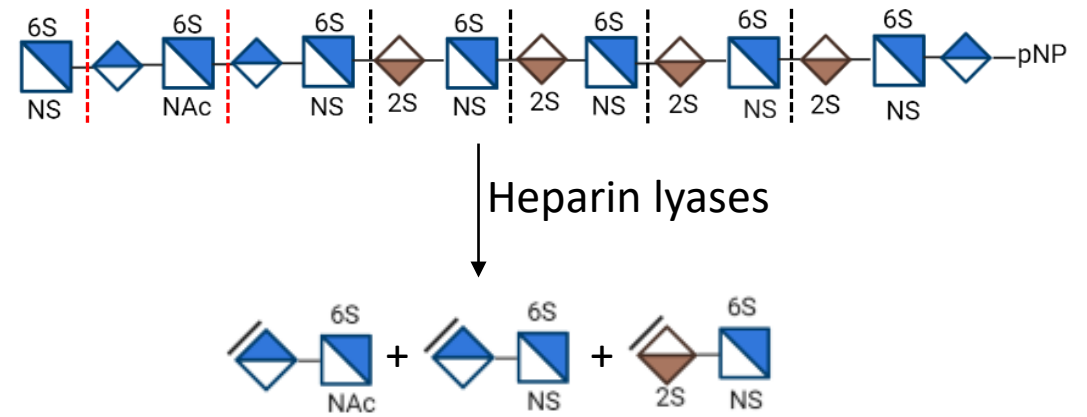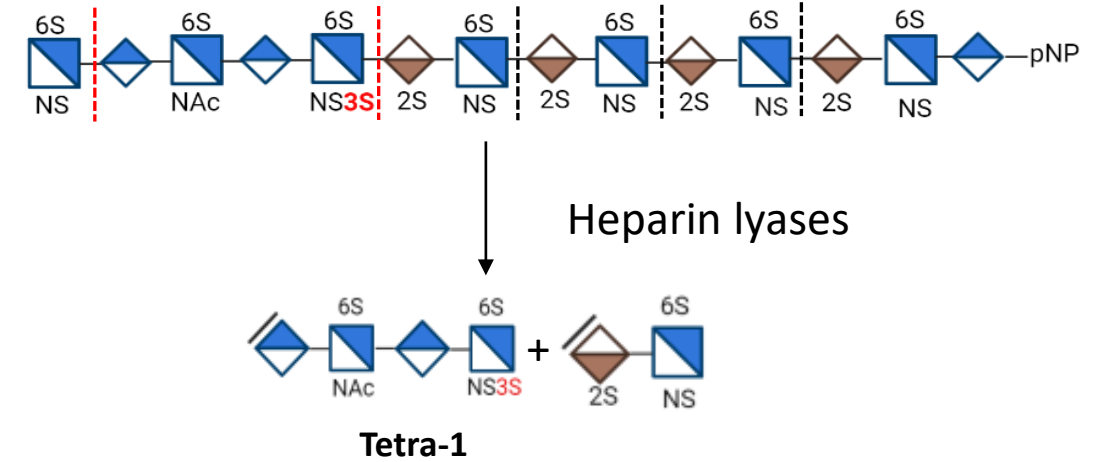

**Suppl Fig S10. The LC-MS analysis of heparin lyases digest of 14-mer-1 and 14-mer-2.** Panel A shows the LC-MS analysis of 14-mer-1. Panel B shows the LC-MS analysis of 14-mer-2.

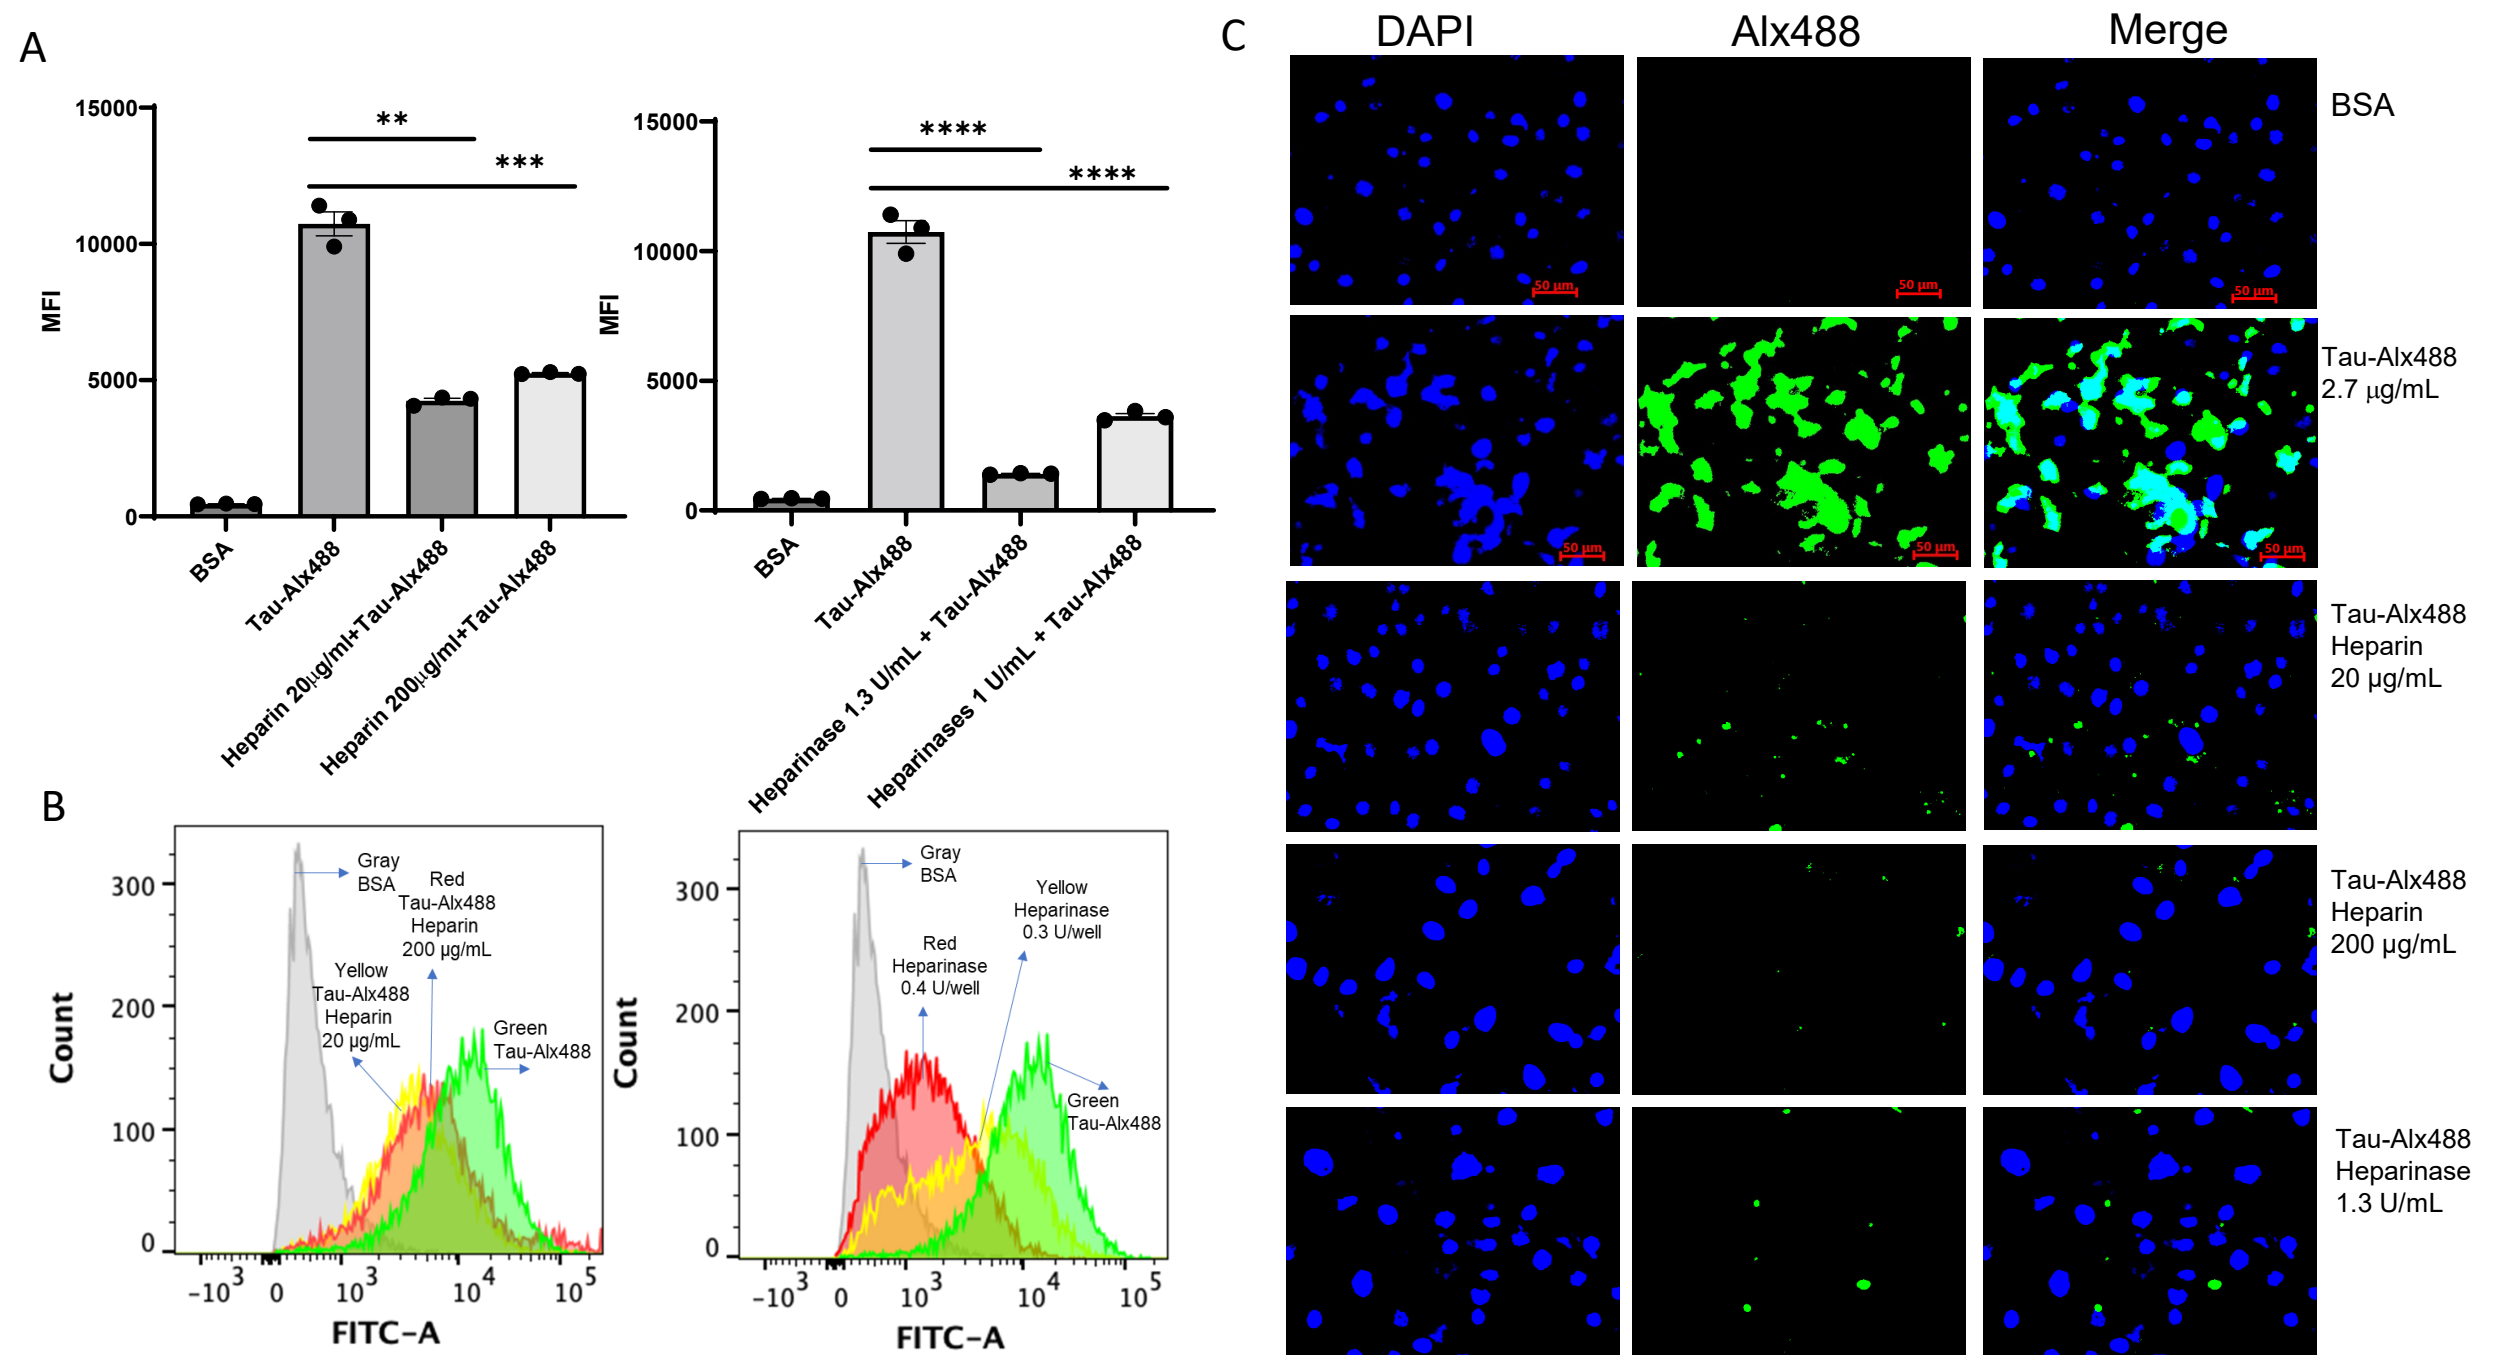

Suppl Fig S11. The inhibition of the cellular binding and cellular internalization of protein tau by heparin and heparinase. Legend is continued on

**Suppl Fig S11. The inhibition of cellular internalization of protein tau by heparin and heparinase.** A) shows the internalization of Alexa488 labeled tau (Tau-Alx488, 2.7 $\mu$ g/mL, 56 nM) to the cells in the absence or the presence of heparin (20 or 200  $\mu$ g/mL, 1.67 and 16.7  $\mu$ M, respectively) or heparinase (1.3 U/mL or 1 U/mL). B) shows overlaid five plots from flow cytometry analysis after the cells incubated with BSA (1.6  $\mu$ g/mL, 24 nM, grey line), with Tau-Alx488 (2.7  $\mu$ g/mL (56 nM), 0.3 mL/well, green line), Tau-Alx488 (2.7  $\mu$ g/mL (56 nM), 0.3 mL/well) and heparin (20  $\mu$ g/mL, 1.67  $\mu$ M) or heparinase (1 U/mL) (yellow line) and Tau-Alx488 and heparin (200  $\mu$ g/mL, 16.7  $\mu$ M) or heparinase (1.3 U/mL) (red line). C) shows the microscopic images of the cells after incubation with BSA (1.6  $\mu$ g/mL, 24 nM, grey line), or Tau-Alx488 (2.7  $\mu$ g/mL (56 nM), 0.3 mL/well) with or without heparin (200  $\mu$ g/mL, 16.7  $\mu$ M) or heparinase (1.3 U/mL).

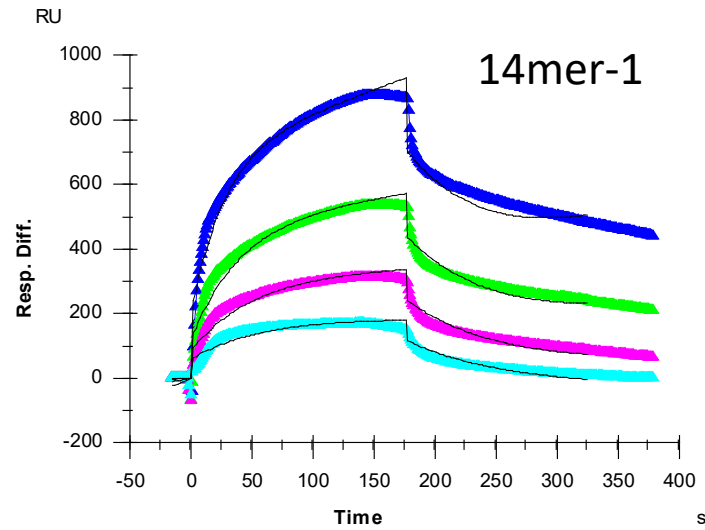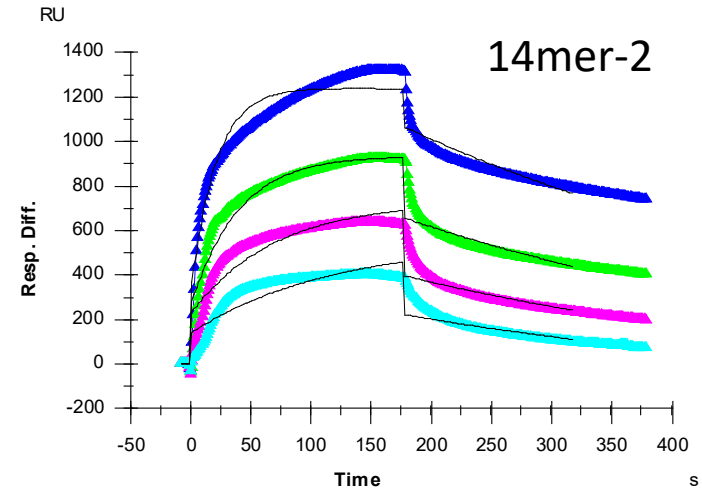

| Interaction  | $k_a$ (1/MS)*                                    | $k_d$ (1/S)                                           | $K_D$ (M)             |
|--------------|--------------------------------------------------|-------------------------------------------------------|-----------------------|
| tau-14-mer-1 | $9.70 \times 10^4$<br>( $\pm 2.78 \times 10^3$ ) | 0.0133<br>( $\pm 3.31 \times 10^{-4}$ )               | $1.37 \times 10^{-7}$ |
| tau-14-mer-2 | $1.81 \times 10^5$<br>( $\pm 5.57 \times 10^3$ ) | $2.6 \times 10^{-3}$<br>( $\pm 1.88 \times 10^{-4}$ ) | $1.44 \times 10^{-8}$ |

**Suppl Fig S12. Determination of the binding affinity between tau and 14-mers.** The SPR sensorgrams are shown on top. The data with ( $\pm$ ) in parentheses are the standard deviations (SD) from global fitting of four injections tau at concentrations from 250, 125, 63 and 32 nM.

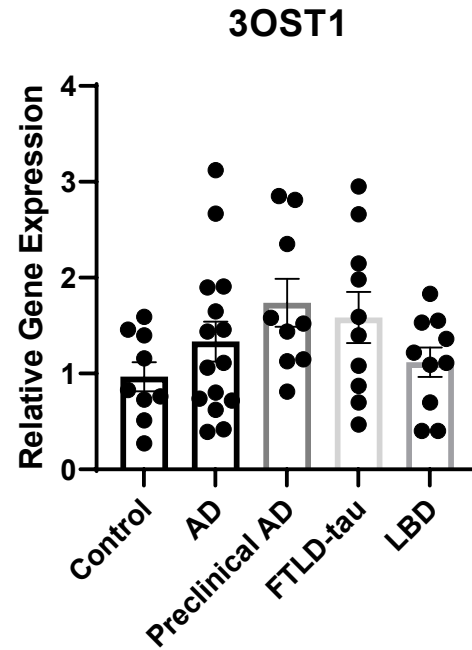

**Suppl Fig S13. qPCR analysis of mRNA expression of 3-OST-1 from disease and patients.** The experiment was done using the ViiA™ 7 Flex Real-Time PCR System (Thermo Fisher). The range of Ct of 3-OST-1, GAPDH, and CYC1 is 22.8 – 32.3, 16.3 – 23.9, 17.4 – 26.9. mRNA levels of 3-OST1 were quantified with the  $2^{-\Delta\Delta C_t}$  method and normalized to the internal control gene GAPDH and CYC1. The results are shown relative to the expression level of the control group.

**Table S1. The quantity of  $\Delta$ IS disaccharide ( $\Delta$ UA2S-GlcNS6S) from neurodegenerative disease brains**The amount of  $\Delta$ UA2S-GlcNS6S in different neurodegenerative diseases (ng/mg)

| Group.Name/No.   | Control         | Preclinic AD    | AD               | FTLD_tau        | LBD             |
|------------------|-----------------|-----------------|------------------|-----------------|-----------------|
| 1                | 5.23            | 4.6             | 9.57             | 5.44            | 5.7             |
| 2                | 5.81            | 4.9             | 7.75             | 2.7             | 4.89            |
| 3                | 4.32            | 6.5             | 13.75            | 8.56            | 4.22            |
| 4                | 5.27            | 5.8             | 7.2              | 4.1             | 5.68            |
| 5                | 2.06            | 13.5            | 6.41             | 6.67            | 5.21            |
| 6                | 3.89            | 6.1             | 10.78            | 7.54            | 3.94            |
| 7                | 5.58            | 7.7             | 14.57            | 7.05            | 7.23            |
| 8                | 5.35            | 10.2            | 7.24             | 7.52            | 7.19            |
| 9                | 7.17            | 6.5             | 10.86            | 8.91            | 11.44           |
| 10               | 4.87            |                 | 12.99            | 8.96            | 9.19            |
| 11               |                 |                 | 20.18            |                 |                 |
| 12               |                 |                 | 12               |                 |                 |
| 13               |                 |                 | 14.69            |                 |                 |
| 14               |                 |                 | 6.64             |                 |                 |
| Average $\pm$ SD | 4.96 $\pm$ 1.28 | 7.31 $\pm$ 2.69 | 11.05 $\pm$ 3.82 | 6.75 $\pm$ 1.98 | 6.47 $\pm$ 2.24 |

The mass percentage of  $\Delta$ UA2S-GlcNS6S in different neurodegenerative diseases (%)

| Group.Name/No.   | Control         | Preclinic AD    | AD              | FTLD_tau        | LBD             |
|------------------|-----------------|-----------------|-----------------|-----------------|-----------------|
| 1                | 5.73            | 5.46            | 3.18            | 2.31            | 5.46            |
| 2                | 6.27            | 2.94            | 5.66            | 4.57            | 4.94            |
| 3                | 5.33            | 3.34            | 3.38            | 3.08            | 4.99            |
| 4                | 4.47            | 3.2             | 3.61            | 4.09            | 4.48            |
| 5                | 4.96            | 5.05            | 3.76            | 6.19            | 5.48            |
| 6                | 3.22            | 3.95            | 6.1             | 3.68            | 4.88            |
| 7                | 3.84            | 4.68            | 4.54            | 4.12            | 3.88            |
| 8                | 3.51            | 3.35            | 4.14            | 2.68            | 6.87            |
| 9                | 5.01            | 3.75            | 3.72            | 5.71            | 5.28            |
| 10               | 2.43            |                 | 3.57            | 5.91            | 3.27            |
| 11               |                 |                 | 3.18            |                 |                 |
| 12               |                 |                 | 4.96            |                 |                 |
| 13               |                 |                 | 5.22            |                 |                 |
| 14               |                 |                 | 2.46            |                 |                 |
| Average $\pm$ SD | 4.48 $\pm$ 1.15 | 3.97 $\pm$ 0.84 | 4.11 $\pm$ 1.01 | 4.23 $\pm$ 1.29 | 4.95 $\pm$ 0.92 |



**Table S2. The quantity of  $\Delta$ IIS disaccharide ( $\Delta$ UA-GlcNS6S) from neurodegenerative disease brains**The amount of  $\Delta$ UA-GlcNS6S in different neurodegenerative diseases (ng/mg)

| Group.Name/No.   | Control (ng/mg) | Preclinic AD (ng/mg) | AD (ng/mg)       | FTLD_tau (ng/mg) | LBD (ng/mg)      |
|------------------|-----------------|----------------------|------------------|------------------|------------------|
| 1                | 3.98            | 6.4                  | 10.67            | 8.58             | 9.16             |
| 2                | 5.43            | 8.8                  | 10.1             | 3.25             | 8.53             |
| 3                | 4.52            | 11.6                 | 13.04            | 13.84            | 6.07             |
| 4                | 3.87            | 10.2                 | 5.35             | 6.67             | 7.99             |
| 5                | 3.6             | 27.6                 | 8.55             | 7.07             | 6.52             |
| 6                | 4.97            | 12.4                 | 18.9             | 11.75            | 5.74             |
| 7                | 6.73            | 13.9                 | 26.66            | 12.48            | 12.16            |
| 8                | 8.31            | 17.1                 | 11.98            | 13.56            | 9.32             |
| 9                | 12.83           | 10.9                 | 19.46            | 10.85            | 17.68            |
| 10               | 8.41            |                      | 22.01            | 8.56             | 18.14            |
| 11               |                 |                      | 37               |                  |                  |
| 12               |                 |                      | 22.22            |                  |                  |
| 13               |                 |                      | 30.99            |                  |                  |
| 14               |                 |                      | 14.23            |                  |                  |
| Average $\pm$ SD | 6.27 $\pm$ 2.75 | 13.21 $\pm$ 5.83     | 17.94 $\pm$ 8.79 | 9.66 $\pm$ 3.25  | 10.13 $\pm$ 4.28 |

The mass percentage of  $\Delta$ UA-GlcNS6S in different neurodegenerative diseases (%)

| Group.Name/No.   | Control         | Preclinic AD    | AD              | FTLD_tau       | LBD            |
|------------------|-----------------|-----------------|-----------------|----------------|----------------|
| 1                | 6.76            | 7.44            | 5.75            | 3.69           | 8.31           |
| 2                | 7.62            | 5.23            | 9.93            | 5.49           | 7.86           |
| 3                | 8.13            | 5.48            | 5.23            | 4.96           | 7.13           |
| 4                | 7.44            | 5.64            | 6.53            | 6.83           | 6.17           |
| 5                | 8.65            | 9.62            | 6.26            | 6.59           | 7.47           |
| 6                | 2.45            | 8.54            | 11.27           | 5.48           | 7.44           |
| 7                | 3.59            | 8.47            | 8.48            | 7.39           | 6.44           |
| 8                | 3.68            | 5.59            | 8.64            | 4.72           | 8.47           |
| 9                | 3.68            | 6.35            | 7.96            | 7              | 8.1            |
| 10               | 4.24            |                 | 3.99            | 5.64           | 6.31           |
| 11               |                 |                 | 4.14            |                |                |
| 12               |                 |                 | 4.7             |                |                |
| 13               |                 |                 | 3.88            |                |                |
| 14               |                 |                 | 3.29            |                |                |
| Average $\pm$ SD | 5.62 $\pm$ 2.18 | 6.93 $\pm$ 1.54 | 6.43 $\pm$ 2.38 | 5.78 $\pm$ 1.1 | 7.37 $\pm$ 0.8 |

**Table S3. The quantity of  $\Delta$ IIIS disaccharide ( $\Delta$ UA2S-GlcNS) from neurodegenerative disease bra**The amount of  $\Delta$ UA2S-GlcNS in different neurodegenerative diseases (ng/mg)

| Group.Name/No.   | Control (ng/mg) | Preclinic AD (ng/mg) | AD (ng/mg)       | FTLD_tau (ng/mg)  | LBD (ng/mg)     |
|------------------|-----------------|----------------------|------------------|-------------------|-----------------|
| 1                | 7.78            | 4.1                  | 14.81            | 12.89             | 4.57            |
| 2                | 7.56            | 9.4                  | 13.67            | 2.79              | 4.62            |
| 3                | 6.66            | 10.8                 | 14.53            | 14.81             | 4.21            |
| 4                | 5.58            | 10.2                 | 7.35             | 4.65              | 6.16            |
| 5                | 3.98            | 15                   | 14.65            | 4.56              | 4.56            |
| 6                | 3.28            | 9.1                  | 15.36            | 54.75             | 4.04            |
| 7                | 3.75            | 12.9                 | 17.97            | 9.1               | 10.39           |
| 8                | 5.08            | 17.6                 | 11.4             | 15.39             | 5.01            |
| 9                | 8.68            | 9.1                  | 20.23            | 6.95              | 10.27           |
| 10               | 5.6             |                      | 21.07            | 7.51              | 13.26           |
| 11               |                 |                      | 27.52            |                   |                 |
| 12               |                 |                      | 17.4             |                   |                 |
| 13               |                 |                      | 25.81            |                   |                 |
| 14               |                 |                      | 12.38            |                   |                 |
| Average $\pm$ SD | 5.8 $\pm$ 1.75  | 10.91 $\pm$ 3.67     | 16.73 $\pm$ 5.29 | 13.34 $\pm$ 14.42 | 6.71 $\pm$ 3.15 |

The mass percentage of  $\Delta$ UA2S-GlcNS in different neurodegenerative diseases (%)

| Group.Name/No.   | Control         | Preclinic AD   | AD             | FTLD_tau        | LBD            |
|------------------|-----------------|----------------|----------------|-----------------|----------------|
| 1                | 4.71            | 4.82           | 3.87           | 5.48            | 4.34           |
| 2                | 4.21            | 5.63           | 7.07           | 4.71            | 4.62           |
| 3                | 5.04            | 5.39           | 5.23           | 5.33            | 4.97           |
| 4                | 5.34            | 5.68           | 6.75           | 4.67            | 4.86           |
| 5                | 5.71            | 5.62           | 6.1            | 4.23            | 4.86           |
| 6                | 4.78            | 6.06           | 8.32           | 19.53           | 5.05           |
| 7                | 4.99            | 7.85           | 6.56           | 5.33            | 5.57           |
| 8                | 5.41            | 5.77           | 7.24           | 5.46            | 4.78           |
| 9                | 5.32            | 5.21           | 6.94           | 4.45            | 4.74           |
| 10               | 4.69            |                | 5.53           | 4.95            | 4.7            |
| 11               |                 |                | 5.6            |                 |                |
| 12               |                 |                | 5.24           |                 |                |
| 13               |                 |                | 5.33           |                 |                |
| 14               |                 |                | 5.63           |                 |                |
| Average $\pm$ SD | 5.02 $\pm$ 0.42 | 5.78 $\pm$ 0.8 | 6.1 $\pm$ 1.08 | 6.41 $\pm$ 4.39 | 4.85 $\pm$ 0.3 |

**Table S4. The quantity of  $\Delta$ IVS disaccharide ( $\Delta$ UA-GlcNS) from neurodegenerative disease brains**The amount of  $\Delta$ UA-GlcNS in different neurodegenerative diseases (ng/mg)

| Group.Name/No.   | Control (ng/mg)  | Preclinic AD (ng/mg) | AD (ng/mg)       | FTLD_tau (ng/mg)  | LBD (ng/mg)      |
|------------------|------------------|----------------------|------------------|-------------------|------------------|
| 1                | 15.39            | 11.9                 | 20.87            | 31.59             | 14.89            |
| 2                | 10.84            | 30                   | 18.52            | 9.16              | 13.65            |
| 3                | 8.78             | 36.9                 | 19.34            | 46.8              | 11.87            |
| 4                | 7.23             | 31.2                 | 8.68             | 15.7              | 21.55            |
| 5                | 5.57             | 40.2                 | 19.16            | 14.46             | 10.63            |
| 6                | 8.74             | 19.4                 | 60.32            | 31.17             | 10.21            |
| 7                | 10.41            | 20.9                 | 26.43            | 21.26             | 23.44            |
| 8                | 7.35             | 44.5                 | 25.65            | 38.15             | 12.46            |
| 9                | 22.13            | 21.8                 | 46.45            | 16.96             | 25.64            |
| 10               | 11.02            |                      | 59.97            | 13.61             | 41.05            |
| 11               |                  |                      | 47.87            |                   |                  |
| 12               |                  |                      | 46.04            |                   |                  |
| 13               |                  |                      | 56.84            |                   |                  |
| 14               |                  |                      | 26.92            |                   |                  |
| Average $\pm$ SD | 10.75 $\pm$ 4.58 | 28.53 $\pm$ 10.19    | 34.5 $\pm$ 16.99 | 23.89 $\pm$ 11.72 | 18.54 $\pm$ 9.17 |

The mass percentage of  $\Delta$ UA-GlcNS in different neurodegenerative diseases (%)

| Group.Name/No.   | Control         | Preclinic AD     | AD               | FTLD_tau         | LBD              |
|------------------|-----------------|------------------|------------------|------------------|------------------|
| 1                | 12.16           | 13.84            | 19.43            | 13.81            | 14.03            |
| 2                | 11.76           | 17.7             | 10.22            | 15.47            | 13.97            |
| 3                | 7.37            | 16.94            | 11.31            | 16.84            | 14.03            |
| 4                | 12.53           | 17.05            | 15.67            | 15.92            | 16.08            |
| 5                | 11.41           | 14.35            | 16.89            | 13.44            | 12.71            |
| 6                | 9.46            | 13.83            | 16.04            | 12.8             | 13.78            |
| 7                | 7.16            | 12.81            | 17.69            | 13.1             | 12.18            |
| 8                | 7.13            | 14.5             | 15.72            | 13.22            | 11.27            |
| 9                | 6.88            | 12.64            | 15.01            | 10.91            | 11.68            |
| 10               | 6.56            |                  | 7.79             | 8.97             | 14.55            |
| 11               |                 |                  | 7.59             |                  |                  |
| 12               |                 |                  | 6.97             |                  |                  |
| 13               |                 |                  | 6.3              |                  |                  |
| 14               |                 |                  | 7.36             |                  |                  |
| Average $\pm$ SD | 9.24 $\pm$ 2.36 | 14.85 $\pm$ 1.79 | 12.43 $\pm$ 4.49 | 13.45 $\pm$ 2.21 | 13.43 $\pm$ 1.39 |

**Table S5. The quantity of  $\Delta$ IA disaccharide ( $\Delta$ UA2S-GlcNAc6S) from neurodegenerative disease bra**The amount of  $\Delta$ UA2S-GlcNAc6S in different neurodegenerative diseases (ng/mg)

| Group.Name/No.   | Control (ng/mg) | Preclinic AD (ng/mg) | AD (ng/mg)      | FTLD_tau (ng/mg) | LBD (ng/mg)    |
|------------------|-----------------|----------------------|-----------------|------------------|----------------|
| 1                | 0.05            | 0.1                  | 0.19            | 0.1              | 0.11           |
| 2                | 0.08            | 0.1                  | 0.18            | 0.01             | 0.09           |
| 3                | 0.08            | 0.1                  | 0.3             | 0.14             | 0.06           |
| 4                | 0.06            | 0.1                  | 0.11            | 0.05             | 0.09           |
| 5                | 0.05            | 0.4                  | 0.15            | 0.08             | 0.06           |
| 6                | 0.07            | 0.1                  | 0.2             | 0.1              | 0.05           |
| 7                | 0.07            | 0.1                  | 0.29            | 0.1              | 0.13           |
| 8                | 0.05            | 0.2                  | 0.19            | 0.17             | 0.12           |
| 9                | 0.16            | 0.1                  | 0.29            | 0.13             | 0.17           |
| 10               | 0.07            |                      | 0.3             | 0.03             | 0.14           |
| 11               |                 |                      | 0.28            |                  |                |
| 12               |                 |                      | 0.28            |                  |                |
| 13               |                 |                      | 0.45            |                  |                |
| 14               |                 |                      | 0.19            |                  |                |
| Average $\pm$ SD | 0.07 $\pm$ 0.03 | 0.14 $\pm$ 0.1       | 0.24 $\pm$ 0.08 | 0.09 $\pm$ 0.05  | 0.1 $\pm$ 0.04 |

The mass percentage of  $\Delta$ UA2S-GlcNAc6S in different neurodegenerative diseases (%)

| Group.Name/No.   | Control         | Preclinic AD    | AD              | FTLD_tau        | LBD             |
|------------------|-----------------|-----------------|-----------------|-----------------|-----------------|
| 1                | 0.09            | 0.09            | 0.07            | 0.04            | 0.09            |
| 2                | 0.08            | 0.06            | 0.09            | 0.01            | 0.08            |
| 3                | 0.04            | 0.06            | 0.07            | 0.05            | 0.07            |
| 4                | 0.07            | 0.06            | 0.1             | 0.07            | 0.06            |
| 5                | 0.08            | 0.11            | 0.08            | 0.07            | 0.08            |
| 6                | 0.03            | 0.07            | 0.11            | 0.04            | 0.08            |
| 7                | 0.05            | 0.08            | 0.12            | 0.06            | 0.07            |
| 8                | 0.07            | 0.06            | 0.12            | 0.05            | 0.1             |
| 9                | 0.06            | 0.08            | 0.1             | 0.08            | 0.08            |
| 10               | 0.06            |                 | 0.07            | 0.02            | 0.05            |
| 11               |                 |                 | 0.07            |                 |                 |
| 12               |                 |                 | 0.11            |                 |                 |
| 13               |                 |                 | 0.08            |                 |                 |
| 14               |                 |                 | 0.06            |                 |                 |
| Average $\pm$ SD | 0.06 $\pm$ 0.02 | 0.07 $\pm$ 0.02 | 0.09 $\pm$ 0.02 | 0.05 $\pm$ 0.02 | 0.08 $\pm$ 0.01 |

**Table S6. The quantity of  $\Delta$ IIA disaccharide ( $\Delta$ UA-GlcNAc6S) from neurodegenerative disease brains**The amount of  $\Delta$ UA-GlcNAc6S in different neurodegenerative diseases (ng/mg)

| Group.Name/No.   | Control (ng/mg)  | Preclinic AD (ng/mg) | AD (ng/mg)      | FTLD_tau (ng/mg) | LBD (ng/mg)    |
|------------------|------------------|----------------------|-----------------|------------------|----------------|
| 1                | 13.44            | 7.5                  | 34.33           | 11.26            | 9.16           |
| 2                | 16.01            | 13                   | 34.88           | 4.66             | 8.2            |
| 3                | 14.82            | 14.7                 | 40.71           | 17.92            | 6.73           |
| 4                | 11.5             | 14.3                 | 16.82           | 8.43             | 10.2           |
| 5                | 11.06            | 25.9                 | 31.26           | 8.27             | 7.79           |
| 6                | 4.73             | 15.4                 | 32.45           | 13.89            | 7.18           |
| 7                | 7.01             | 19.1                 | 29.55           | 15.35            | 15.65          |
| 8                | 7.82             | 24.2                 | 16.54           | 19.73            | 10.72          |
| 9                | 13.53            | 15.5                 | 30.29           | 11.24            | 19.76          |
| 10               | 8.89             |                      | 31.82           | 14.77            | 22.56          |
| 11               |                  |                      | 41.27           |                  |                |
| 12               |                  |                      | 27.27           |                  |                |
| 13               |                  |                      | 36.47           |                  |                |
| 14               |                  |                      | 19.18           |                  |                |
| Average $\pm$ SD | 10.88 $\pm$ 3.49 | 16.62 $\pm$ 5.35     | 30.2 $\pm$ 7.64 | 12.55 $\pm$ 4.43 | 11.8 $\pm$ 5.3 |

The mass percentage of  $\Delta$ UA-GlcNAc6S in different neurodegenerative diseases (%)

| Group.Name/No.   | Control         | Preclinic AD    | AD               | FTLD_tau       | LBD            |
|------------------|-----------------|-----------------|------------------|----------------|----------------|
| 1                | 6.84            | 8.94            | 9.47             | 4.76           | 8.72           |
| 2                | 7.87            | 7.76            | 10.9             | 7.87           | 8.19           |
| 3                | 7.66            | 7.46            | 7.7              | 6.45           | 7.96           |
| 4                | 8.34            | 7.92            | 10.1             | 8.41           | 8.1            |
| 5                | 9.05            | 9.69            | 9.21             | 7.68           | 8.25           |
| 6                | 8.26            | 10.34           | 12.66            | 6.93           | 8.92           |
| 7                | 10.58           | 11.67           | 10.36            | 8.94           | 8.4            |
| 8                | 12.04           | 7.96            | 10.26            | 7              | 10.33          |
| 9                | 10.94           | 8.89            | 10.76            | 7.21           | 9.12           |
| 10               | 13.04           |                 | 12.82            | 9.74           | 8.03           |
| 11               |                 |                 | 14.29            |                |                |
| 12               |                 |                 | 14.67            |                |                |
| 13               |                 |                 | 12.2             |                |                |
| 14               |                 |                 | 12.01            |                |                |
| Average $\pm$ SD | 9.46 $\pm$ 1.96 | 8.96 $\pm$ 1.31 | 11.24 $\pm$ 1.89 | 7.5 $\pm$ 1.32 | 8.6 $\pm$ 0.69 |

**Table S7. The quantity of  $\Delta$ IIIA disaccharide ( $\Delta$ UA2S-GlcNAc) from neurodegenerative disease brains**The amount of  $\Delta$ UA2S-GlcNAc in different neurodegenerative diseases (ng/mg)

| Group.Name/No.   | Control (ng/mg) | Preclinic AD (ng/mg) | AD (ng/mg)      | FTLD_tau (ng/mg) | LBD (ng/mg)     |
|------------------|-----------------|----------------------|-----------------|------------------|-----------------|
| 1                | 0.65            | 0.4                  | 2.15            | 0.7              | 0.33            |
| 2                | 0.37            | 0.8                  | 1.3             | 0.38             | 0.31            |
| 3                | 0.73            | 0.7                  | 1.72            | 0.96             | 0.36            |
| 4                | 0               | 0.7                  | 0.86            | 0.38             | 0.47            |
| 5                | 0.16            | 0.9                  | 1.64            | 0.48             | 0.49            |
| 6                | 0.26            | 1.3                  | 2.21            | 0.55             | 0.34            |
| 7                | 0.35            | 1.5                  | 1.56            | 1.3              | 1.81            |
| 8                | 0.52            | 1.3                  | 2.72            | 2.01             | 0.47            |
| 9                | 0.62            | 0.8                  | 2.03            | 0.87             | 0.98            |
| 10               | 0.46            |                      | 2.18            | 1.31             | 0.72            |
| 11               |                 |                      | 3.55            |                  |                 |
| 12               |                 |                      | 2.93            |                  |                 |
| 13               |                 |                      | 2.24            |                  |                 |
| 14               |                 |                      | 2.59            |                  |                 |
| Average $\pm$ SD | 0.41 $\pm$ 0.22 | 0.93 $\pm$ 0.34      | 2.12 $\pm$ 0.67 | 0.89 $\pm$ 0.49  | 0.63 $\pm$ 0.44 |

The mass percentage of  $\Delta$ UA2S-GlcNAc in different neurodegenerative diseases (%)

| Group.Name/No.   | Control         | Preclinic AD    | AD              | FTLD_tau       | LBD             |
|------------------|-----------------|-----------------|-----------------|----------------|-----------------|
| 1                | 0.47            | 0.48            | 0.54            | 0.28           | 0.38            |
| 2                | 0.38            | 0.48            | 0.93            | 0.64           | 0.41            |
| 3                | 0.55            | 0.41            | 1.31            | 0.36           | 0.44            |
| 4                | 0.52            | 0.43            | 0.65            | 0.32           | 0.42            |
| 5                | 0.45            | 0.47            | 0.68            | 0.43           | 0.42            |
| 6                | 0.4             | 0.88            | 1.06            | 0.37           | 0.38            |
| 7                | 0.24            | 0.94            | 1.08            | 0.77           | 0.97            |
| 8                | 0.6             | 0.45            | 0.67            | 0.72           | 0.53            |
| 9                | 0               | 0.42            | 1.45            | 0.55           | 0.47            |
| 10               | 0.19            |                 | 0.8             | 0.87           | 0.28            |
| 11               |                 |                 | 0.53            |                |                 |
| 12               |                 |                 | 0.62            |                |                 |
| 13               |                 |                 | 0.62            |                |                 |
| 14               |                 |                 | 0.63            |                |                 |
| Average $\pm$ SD | 0.38 $\pm$ 0.18 | 0.55 $\pm$ 0.19 | 0.83 $\pm$ 0.28 | 0.53 $\pm$ 0.2 | 0.47 $\pm$ 0.18 |

**Table S8. The quantity of  $\Delta$ IVA disaccharide ( $\Delta$ UA-GlcNAc) from neurodegenerative disease brains**The amount of  $\Delta$ UA-GlcNAc in different neurodegenerative diseases (ng/mg)

| Group.Name/No.   | Control (ng/mg)   | Preclinic AD (ng/mg) | AD (ng/mg)         | FTLD_tau (ng/mg)   | LBD (ng/mg)       |
|------------------|-------------------|----------------------|--------------------|--------------------|-------------------|
| 1                | 112.01            | 48.9                 | 146.64             | 160.33             | 60.1              |
| 2                | 99.23             | 98.2                 | 136.04             | 35.07              | 58.66             |
| 3                | 76.94             | 118.5                | 158.51             | 171.96             | 49.91             |
| 4                | 66.96             | 104.2                | 84.03              | 56.62              | 72.78             |
| 5                | 52.59             | 143.2                | 168.22             | 64.36              | 53.3              |
| 6                | 45.19             | 74.9                 | 181.71             | 102.37             | 45.39             |
| 7                | 52.85             | 67.3                 | 130.22             | 96.98              | 114.76            |
| 8                | 64.01             | 181.7                | 144.83             | 183.77             | 58.41             |
| 9                | 98.02             | 105.4                | 159.29             | 94.51              | 123.9             |
| 10               | 55.21             |                      | 185.04             | 93.29              | 172.34            |
| 11               |                   |                      | 92.59              |                    |                   |
| 12               |                   |                      | 123.08             |                    |                   |
| 13               |                   |                      | 169.74             |                    |                   |
| 14               |                   |                      | 88.87              |                    |                   |
| Average $\pm$ SD | 72.30 $\pm$ 22.08 | 104.7 $\pm$ 38.07    | 140.63 $\pm$ 32.31 | 105.93 $\pm$ 47.90 | 80.96 $\pm$ 39.80 |

The mass percentage of  $\Delta$ UA-GlcNAc in different neurodegenerative diseases (%)

| Group.Name/No.   | Control          | Preclinic AD     | AD               | FTLD_tau         | LBD              |
|------------------|------------------|------------------|------------------|------------------|------------------|
| 1                | 61.6             | 57.42            | 54.46            | 68.45            | 55.65            |
| 2                | 59.78            | 58.47            | 50.83            | 59.24            | 57.6             |
| 3                | 62.99            | 58.57            | 64.1             | 61.74            | 58.71            |
| 4                | 58.22            | 57.7             | 53.2             | 58.13            | 56.71            |
| 5                | 56.62            | 51.74            | 53.24            | 59.99            | 58.62            |
| 6                | 68.86            | 51.66            | 31.87            | 48.77            | 57.54            |
| 7                | 65.56            | 41.21            | 46.56            | 57.33            | 60.87            |
| 8                | 62.5             | 59.65            | 47.34            | 64.99            | 54.56            |
| 9                | 63.74            | 60.71            | 49.81            | 60.82            | 56.91            |
| 10               | 61.99            |                  | 54.76            | 61.48            | 60.55            |
| 11               |                  |                  | 55.74            |                  |                  |
| 12               |                  |                  | 57.11            |                  |                  |
| 13               |                  |                  | 60.93            |                  |                  |
| 14               |                  |                  | 64.64            |                  |                  |
| Average $\pm$ SD | 62.19 $\pm$ 3.35 | 55.24 $\pm$ 5.81 | 53.19 $\pm$ 7.95 | 60.09 $\pm$ 4.89 | 57.77 $\pm$ 1.89 |

**Table S9. The quantity of Tetra-1 ( $\Delta$ UA-GlcNAc6S-GlcA-GlcNS3S6S) from neurodegenerative disease brains**The amount of  $\Delta$ UA-GlcNAc6S-GlcA-GlcNS3S6S in different neurodegenerative diseases (ng/mg)

| Group.Name/No.   | Control (ng/mg) | Preclinic AD (ng/mg) | AD (ng/mg)      | FTLD_tau (ng/mg) | LBD (ng/mg)    |
|------------------|-----------------|----------------------|-----------------|------------------|----------------|
| 1                | 0.47            | 0.6                  | 3.81            | 0.75             | 0.75           |
| 2                | 0.82            | 0.9                  | 3.13            | 0.27             | 0.62           |
| 3                | 0.39            | 1.2                  | 4.75            | 1.09             | 0.37           |
| 4                | 0.44            | 0.7                  | 1.47            | 0.66             | 0.76           |
| 5                | 0.58            | 2.6                  | 2.11            | 0.61             | 0.51           |
| 6                | 0.3             | 1.6                  | 4.3             | 1.15             | 0.45           |
| 7                | 0.6             | 3.9                  | 4.04            | 0.9              | 0.75           |
| 8                | 0.69            | 2.8                  | 1.31            | 1.12             | 0.8            |
| 9                | 1.14            | 1.2                  | 4.88            | 0.91             | 1.81           |
| 10               | 0.61            |                      | 3.66            | 1.32             | 1.13           |
| 11               |                 |                      | 12.04           |                  |                |
| 12               |                 |                      | 5.36            |                  |                |
| 13               |                 |                      | 6.07            |                  |                |
| 14               |                 |                      | 2.48            |                  |                |
| Average $\pm$ SD | 0.64 $\pm$ 0.23 | 1.72 $\pm$ 1.07      | 4.24 $\pm$ 2.56 | 0.88 $\pm$ 0.30  | 0.8 $\pm$ 0.39 |

The mass percentage of  $\Delta$ UA-GlcNAc6S-GlcA-GlcNS3S6S in different neurodegenerative diseases (%)

| Group.Name/No.   | Control         | Preclinic AD    | AD             | FTLD_tau        | LBD             |
|------------------|-----------------|-----------------|----------------|-----------------|-----------------|
| 1                | 0.43            | 0.65            | 1.27           | 0.31            | 0.7             |
| 2                | 0.68            | 0.55            | 1.61           | 0.46            | 0.62            |
| 3                | 0.7             | 0.61            | 0.59           | 0.39            | 0.44            |
| 4                | 0.69            | 0.39            | 1.63           | 0.65            | 0.6             |
| 5                | 0.62            | 0.94            | 1.06           | 0.56            | 0.49            |
| 6                | 0.29            | 1.08            | 3.48           | 0.56            | 0.54            |
| 7                | 0.54            | 2.4             | 2.04           | 0.52            | 0.4             |
| 8                | 0.32            | 0.93            | 1.7            | 0.4             | 0.75            |
| 9                | 0.42            | 0.67            | 1.39           | 0.58            | 0.83            |
| 10               | 0.69            |                 | 1.42           | 0.87            | 0.4             |
| 11               |                 |                 | 1.28           |                 |                 |
| 12               |                 |                 | 1.71           |                 |                 |
| 13               |                 |                 | 1.07           |                 |                 |
| 14               |                 |                 | 0.81           |                 |                 |
| Average $\pm$ SD | 0.54 $\pm$ 0.15 | 0.91 $\pm$ 0.56 | 1.5 $\pm$ 0.66 | 0.53 $\pm$ 0.15 | 0.58 $\pm$ 0.14 |



**Table S10. The quantity of Tetra-2 ( $\Delta$ UA-GlcNS6S-GlcA-GlcNS3S6S) from neurodegenerative disease brain**The amount of  $\Delta$ UA-GlcNS6S-GlcA-GlcNS3S6S in different neurodegenerative diseases (ng/mg)

| Group.Name/No.   | Control (ng/mg) | Preclinic AD (ng/mg) | AD (ng/mg)      | FTLD_tau (ng/mg) | LBD (ng/mg)     |
|------------------|-----------------|----------------------|-----------------|------------------|-----------------|
| 1                | 0.44            | 0.1                  | 0.91            | 0.2              | 0.68            |
| 2                | 0.58            | 0.4                  | 0.57            | 0.02             | 0.54            |
| 3                | 0.36            | 1.2                  | 0.84            | 0.97             | 0.16            |
| 4                | 0.2             | 0.9                  | 0.37            | 0.25             | 0.72            |
| 5                | 0.49            | 2.1                  | 0.55            | 0.07             | 0.57            |
| 6                | 0.1             | 1.1                  | 1.94            | 0.66             | 0.09            |
| 7                | 0.33            | 2.5                  | 1.58            | 1.01             | 0.66            |
| 8                | 0.72            | 1.7                  | 0.77            | 0.45             | 0.62            |
| 9                | 1.11            | 0.6                  | 1.36            | 1.56             | 2.14            |
| 10               | 0.42            |                      | 2.15            | 0.96             | 0.93            |
| 11               |                 |                      | 5.22            |                  |                 |
| 12               |                 |                      | 1.49            |                  |                 |
| 13               |                 |                      | 2.98            |                  |                 |
| 14               |                 |                      | 0.83            |                  |                 |
| Average $\pm$ SD | 0.48 $\pm$ 0.27 | 1.18 $\pm$ 0.75      | 1.54 $\pm$ 1.24 | 0.6 $\pm$ 0.47   | 0.71 $\pm$ 0.53 |

The mass percentage of  $\Delta$ UA-GlcNS6S-GlcA-GlcNS3S6S in different neurodegenerative diseases (%)

| Group.Name/No.   | Control        | Preclinic AD    | AD              | FTLD_tau        | LBD            |
|------------------|----------------|-----------------|-----------------|-----------------|----------------|
| 1                | 0.18           | 0.09            | 0.54            | 0.08            | 0.65           |
| 2                | 0.37           | 0.27            | 0.6             | 0.03            | 0.5            |
| 3                | 0.72           | 0.6             | 0.33            | 0.35            | 0.21           |
| 4                | 0.63           | 0.5             | 0.45            | 0.21            | 0.57           |
| 5                | 0.41           | 0.72            | 0.62            | 0.06            | 0.58           |
| 6                | 0.27           | 0.67            | 1.49            | 0.32            | 0.25           |
| 7                | 0.38           | 1.53            | 0.55            | 0.56            | 0.35           |
| 8                | 0.29           | 0.57            | 0.83            | 0.16            | 0.56           |
| 9                | 0.19           | 0.37            | 0.46            | 1               | 0.99           |
| 10               | 0.58           |                 | 0.34            | 0.63            | 0.34           |
| 11               |                |                 | 0.23            |                 |                |
| 12               |                |                 | 0.3             |                 |                |
| 13               |                |                 | 0.27            |                 |                |
| 14               |                |                 | 0.21            |                 |                |
| Average $\pm$ SD | 0.4 $\pm$ 0.18 | 0.59 $\pm$ 0.38 | 0.52 $\pm$ 0.32 | 0.34 $\pm$ 0.29 | 0.5 $\pm$ 0.22 |

**Table S11. The quantity of Tetra-3 ( $\Delta$ UA-GlcNS6S-IdoA2S-GlcNS3S6S) from neurodegenerative disease brains**The amount of  $\Delta$ UA-GlcNS6S-IdoA2S-GlcNS3S6S in different neurodegenerative diseases (ng/mg)

| Group.Name/No.   | Control (ng/mg) | Preclinic AD (ng/mg) | AD (ng/mg)      | FTLD_tau (ng/mg) | LBD (ng/mg)     |
|------------------|-----------------|----------------------|-----------------|------------------|-----------------|
| 1                | 1.67            | 0                    | 16.41           | 0                | 0.69            |
| 2                | 1.97            | 0.4                  | 11.92           | 0.38             | 0.24            |
| 3                | 2.65            | 0.6                  | 6.09            | 0                | 0.34            |
| 4                | 2.42            | 0.6                  | 3.06            | 0                | 0.93            |
| 5                | 2.82            | 0.4                  | 3.07            | 0.31             | 0.14            |
| 6                | 0               | 1                    | 1.12            | 0.46             | 0.11            |
| 7                | 0.12            | 1.3                  | 0.71            | 0                | 0               |
| 8                | 0.46            | 0.8                  | 0.27            | 0.39             | 0.73            |
| 9                | 0.76            | 0.4                  | 0               | 1.57             | 0.95            |
| 10               | 0.48            |                      | 0.82            | 0                | 1.13            |
| 11               |                 |                      | 2.52            |                  |                 |
| 12               |                 |                      | 1.33            |                  |                 |
| 13               |                 |                      | 2.83            |                  |                 |
| 14               |                 |                      | 1               |                  |                 |
| Average $\pm$ SD | 1.34 $\pm$ 1.04 | 0.6 $\pm$ 0.36       | 3.65 $\pm$ 4.63 | 0.3 $\pm$ 0.46   | 0.53 $\pm$ 0.39 |

The mass percentage of  $\Delta$ UA-GlcNS6S-IdoA2S-GlcNS3S6S in different neurodegenerative diseases (%)

| Group.Name/No.   | Control         | Preclinic AD    | AD             | FTLD_tau        | LBD             |
|------------------|-----------------|-----------------|----------------|-----------------|-----------------|
| 1                | 0               | 0               | 0.32           | 0               | 0.7             |
| 2                | 0.14            | 0.23            | 0.42           | 0.64            | 0.19            |
| 3                | 0.46            | 0.34            | 0.13           | 0               | 0.41            |
| 4                | 0.56            | 0.36            | 0              | 0               | 0.77            |
| 5                | 0.48            | 0.17            | 0.24           | 0.28            | 0.22            |
| 6                | 1.03            | 0.65            | 0.72           | 0.31            | 0.16            |
| 7                | 1.3             | 0.8             | 0.51           | 0               | 0               |
| 8                | 2.15            | 0.27            | 0.82           | 0.16            | 0.78            |
| 9                | 2.31            | 0.23            | 0.56           | 0.99            | 0.46            |
| 10               | 3.32            |                 | 6.13           | 0               | 0.43            |
| 11               |                 |                 | 4.88           |                 |                 |
| 12               |                 |                 | 2.19           |                 |                 |
| 13               |                 |                 | 2.22           |                 |                 |
| 14               |                 |                 | 1.18           |                 |                 |
| Average $\pm$ SD | 1.18 $\pm$ 1.03 | 0.34 $\pm$ 0.23 | 1.45 $\pm$ 1.8 | 0.24 $\pm$ 0.32 | 0.41 $\pm$ 0.26 |

**Table S12. The quantity of Tetra-4 ( $\Delta$ UA-GlcNS-IdoA2S-GlcNS3S) from neurodegenerative disease brains**The amount of  $\Delta$ UA-GlcNS-IdoA2S-GlcNS3S in different neurodegenerative diseases (ng/mg)

| Group.Name/No.   | Control (ng/mg) | Preclinic AD (ng/mg) | AD (ng/mg)      | FTLD_tau (ng/mg) | LBD (ng/mg)     |
|------------------|-----------------|----------------------|-----------------|------------------|-----------------|
| 1                | 1.09            | 0.4                  | 6.32            | 1.8              | 0.73            |
| 2                | 1.93            | 0.7                  | 5.05            | 0.41             | 0.69            |
| 3                | 2.34            | 1.1                  | 2.65            | 1.05             | 0.38            |
| 4                | 1.09            | 1.6                  | 1.59            | 0.59             | 1.22            |
| 5                | 1.44            | 2.9                  | 3.19            | 0.34             | 0.85            |
| 6                | 0.49            | 2.8                  | 2.75            | 1.8              | 0.77            |
| 7                | 0.6             | 11                   | 3.67            | 2.77             | 1.2             |
| 8                | 0.79            | 2                    | 0.9             | 1.06             | 0.77            |
| 9                | 1.46            | 0.8                  | 2.92            | 0.79             | 2.45            |
| 10               | 1.17            |                      | 2.13            | 1.2              | 2.42            |
| 11               |                 |                      | 20.01           |                  |                 |
| 12               |                 |                      | 3               |                  |                 |
| 13               |                 |                      | 7.06            |                  |                 |
| 14               |                 |                      | 2.61            |                  |                 |
| Average $\pm$ SD | 1.24 $\pm$ 0.55 | 2.59 $\pm$ 3.09      | 4.56 $\pm$ 4.59 | 1.18 $\pm$ 0.72  | 1.15 $\pm$ 0.68 |

The mass percentage of  $\Delta$ UA-GlcNS-IdoA2S-GlcNS3S in different neurodegenerative diseases (%)

| Group.Name/No.   | Control       | Preclinic AD    | AD              | FTLD_tau        | LBD            |
|------------------|---------------|-----------------|-----------------|-----------------|----------------|
| 1                | 0.84          | 0.53            | 0.8             | 0.73            | 0.74           |
| 2                | 0.66          | 0.43            | 1.39            | 0.69            | 0.73           |
| 3                | 0.79          | 0.57            | 0.41            | 0.38            | 0.45           |
| 4                | 0.92          | 0.89            | 0.98            | 0.52            | 0.98           |
| 5                | 1.17          | 1.19            | 0.61            | 0.31            | 0.8            |
| 6                | 0.67          | 1.8             | 5.53            | 0.97            | 0.91           |
| 7                | 1.27          | 6.74*           | 1.15            | 1.56            | 0.66           |
| 8                | 1.9           | 0.67            | 2.01            | 0.38            | 0.72           |
| 9                | 1.04          | 0.48            | 1.46            | 0.51            | 1.13           |
| 10               | 1.7           |                 | 2.36            | 0.79            | 0.9            |
| 11               |               |                 | 2.07            |                 |                |
| 12               |               |                 | 0.96            |                 |                |
| 13               |               |                 | 1.15            |                 |                |
| 14               |               |                 | 1.23            |                 |                |
| Average $\pm$ SD | 1.1 $\pm$ 0.4 | 0.82 $\pm$ 0.44 | 1.58 $\pm$ 1.22 | 0.68 $\pm$ 0.35 | 0.8 $\pm$ 0.18 |

**Table S13. The quantity of Tetra-5 ( $\Delta$ UA2S-GlcNS-IdoA2S-GlcNS3S) from neurodegenerative disease brains**The amount of  $\Delta$ UA2S-GlcNS-IdoA2S-GlcNS3S in different neurodegenerative diseases (ng/mg)

| Group.Name/No.   | Control (ng/mg) | Preclinic AD (ng/mg) | AD (ng/mg)      | FTLD_tau (ng/mg) | LBD (ng/mg)    |
|------------------|-----------------|----------------------|-----------------|------------------|----------------|
| 1                | 0.49            | 0.2                  | 1.12            | 0.16             | 0.21           |
| 2                | 0.73            | 0.4                  | 0.96            | 0.12             | 0.24           |
| 3                | 0.5             | 0.4                  | 1.31            | 0.21             | 0.19           |
| 4                | 0.46            | 0.3                  | 1.01            | 0.22             | 0.25           |
| 5                | 0.45            | 0.8                  | 1.27            | 0.15             | 0.22           |
| 6                | 0.09            | 0.7                  | 1.11            | 0.44             | 0.22           |
| 7                | 0.18            | 1.3                  | 0.69            | 0.54             | 0.37           |
| 8                | 0.19            | 0.7                  | 0.39            | 0.2              | 0.26           |
| 9                | 0.39            | 0.4                  | 1.06            | 0.31             | 0.5            |
| 10               | 0.39            |                      | 4.52            | 0.22             | 0.55           |
| 11               |                 |                      | 4.97            |                  |                |
| 12               |                 |                      | 1.05            |                  |                |
| 13               |                 |                      | 1.69            |                  |                |
| 14               |                 |                      | 0.66            |                  |                |
| Average $\pm$ SD | 0.39 $\pm$ 0.18 | 0.58 $\pm$ 0.32      | 1.56 $\pm$ 1.34 | 0.26 $\pm$ 0.13  | 0.3 $\pm$ 0.13 |

The mass percentage of  $\Delta$ UA2S-GlcNS-IdoA2S-GlcNS3S in different neurodegenerative diseases (%)

| Group.Name/No.   | Control         | Preclinic AD    | AD              | FTLD_tau        | LBD             |
|------------------|-----------------|-----------------|-----------------|-----------------|-----------------|
| 1                | 0.16            | 0.25            | 0.29            | 0.07            | 0.22            |
| 2                | 0.19            | 0.25            | 0.35            | 0.2             | 0.28            |
| 3                | 0.19            | 0.22            | 0.2             | 0.08            | 0.22            |
| 4                | 0.28            | 0.19            | 0.35            | 0.2             | 0.21            |
| 5                | 0.39            | 0.33            | 1.23            | 0.14            | 0.2             |
| 6                | 0.3             | 0.46            | 1.35            | 0.26            | 0.25            |
| 7                | 0.48            | 0.82            | 0.37            | 0.3             | 0.21            |
| 8                | 0.41            | 0.24            | 0.49            | 0.07            | 0.28            |
| 9                | 0.44            | 0.21            | 0.38            | 0.2             | 0.23            |
| 10               | 0.53            |                 | 0.42            | 0.14            | 0.2             |
| 11               |                 |                 | 0.4             |                 |                 |
| 12               |                 |                 | 0.47            |                 |                 |
| 13               |                 |                 | 0.73            |                 |                 |
| 14               |                 |                 | 0.49            |                 |                 |
| Average $\pm$ SD | 0.34 $\pm$ 0.12 | 0.33 $\pm$ 0.19 | 0.54 $\pm$ 0.33 | 0.17 $\pm$ 0.08 | 0.23 $\pm$ 0.03 |

**Supplementary Table S14. The mass percentage of HS disaccharides and 3-O-sulfation tetrasaccharides in the brain samples**

| Di/tetra-saccharides         | Mass percentage (%) |       |       |       |       |       |       |       |       |       |       |       |       |       |       |       |
|------------------------------|---------------------|-------|-------|-------|-------|-------|-------|-------|-------|-------|-------|-------|-------|-------|-------|-------|
|                              | A1                  | A2    | A3    | A4    | B1    | B2    | B3    | B4    | F1    | F2    | F3    | F4    | G1    | G2    | G3    | G4    |
| △UA-GlcNAc                   | 52.47               | 51.08 | 52.82 | 55.90 | 55.77 | 50.18 | 47.89 | 52.26 | 51.89 | 52.17 | 56.44 | 52.32 | 52.23 | 55.63 | 51.61 | 51.48 |
| △UA2S-GlcNAc                 | 1.01                | 0.99  | 1.25  | 1.25  | 1.13  | 1.21  | 1.04  | 1.05  | 1.17  | 1.20  | 0.82  | 1.16  | 1.25  | 1.14  | 1.13  | 1.03  |
| △UA-GlcNAc6S                 | 8.32                | 8.23  | 7.60  | 7.78  | 8.47  | 8.52  | 9.87  | 8.87  | 7.63  | 7.40  | 7.70  | 7.88  | 7.37  | 7.68  | 7.49  | 7.24  |
| △UA2S-GlcNAc6S               | 0.07                | 0.09  | 0.07  | 0.06  | 0.09  | 0.07  | 0.06  | 0.08  | 0.07  | 0.07  | 0.06  | 0.08  | 0.07  | 0.05  | 0.08  | 0.07  |
| △UA-GlcNS                    | 15.82               | 16.46 | 15.73 | 13.85 | 14.23 | 15.05 | 15.52 | 15.24 | 15.40 | 15.52 | 13.70 | 15.51 | 14.53 | 15.00 | 14.65 | 15.16 |
| △UA2S-GlcNS                  | 9.40                | 9.95  | 9.76  | 8.68  | 8.20  | 9.30  | 9.29  | 9.03  | 10.03 | 9.86  | 8.14  | 9.62  | 10.15 | 8.61  | 9.90  | 9.79  |
| △UA-GlcNS6S                  | 7.71                | 7.41  | 7.60  | 7.72  | 8.51  | 9.30  | 9.87  | 8.63  | 7.77  | 7.59  | 7.89  | 7.71  | 7.79  | 7.42  | 8.53  | 9.24  |
| △UA2S-GlcNS6S                | 2.77                | 2.62  | 2.95  | 2.44  | 2.43  | 3.48  | 3.12  | 2.98  | 3.37  | 3.26  | 2.40  | 3.23  | 4.45  | 2.59  | 4.43  | 4.07  |
| △UA-GlcNAc6S-GlcA-GlcNS3S6S  | 0.54                | 0.63  | 0.59  | 0.68  | 0.09  | 0.14  | 0.12  | 0.08  | 0.62  | 0.67  | 0.69  | 0.66  | 0.63  | 0.62  | 0.64  | 0.62  |
| △UA-GlcNS6S-GlcA-GlcNS3S6S   | 0.54                | 0.63  | 0.39  | 0.34  | 0.18  | 0.85  | 0.81  | 0.40  | 0.82  | 0.87  | 0.38  | 0.66  | 0.70  | 0.31  | 0.72  | 0.48  |
| △UA-GlcNS6S-IdoA2S-GlcNS3S6S | 0.00                | 0.00  | 0.00  | 0.00  | 0.00  | 0.00  | 0.00  | 0.00  | 0.00  | 0.00  | 0.00  | 0.00  | 0.00  | 0.00  | 0.00  | 0.00  |
| △UA-GlcNS-IdoA2S-GlcNS3S     | 0.68                | 1.36  | 0.79  | 0.68  | 0.50  | 1.14  | 1.73  | 0.65  | 0.82  | 0.80  | 1.33  | 0.58  | 0.35  | 0.47  | 0.48  | 0.41  |
| △UA2S-GlcNS-IdoA2S-GlcNS3S   | 0.61                | 0.45  | 0.52  | 0.62  | 0.50  | 0.64  | 0.46  | 0.48  | 0.48  | 0.53  | 0.38  | 0.58  | 0.49  | 0.47  | 0.40  | 0.48  |

Note: A group: HS3-OST-1 WT; B group: HS3-OST-1 KO; F group: HS3-OST-3a1 and 3b1 WT; G group: HS3-OST-3a1 and 3b1 DKO

**Supplementary Table S15. The mass percentage of HS disaccharides and 3-O-sulfation tetrasaccharides in the liver samples**

| Di-/tetra-saccharides        | Mass percentage (%) |       |       |       |       |       |       |       |       |       |       |       |       |       |       |
|------------------------------|---------------------|-------|-------|-------|-------|-------|-------|-------|-------|-------|-------|-------|-------|-------|-------|
|                              | A1                  | A2    | A3    | A4    | B1    | B2    | B3    | B4    | C1    | C2    | C3    | C4    | F1    | F2    | F3    |
| △UA-GlcNAc                   | 49.21               | 46.97 | 45.90 | 48.28 | 44.55 | 45.36 | 44.17 | 49.34 | 53.33 | 46.36 | 49.23 | 45.93 | 47.06 | 44.39 | 44.06 |
| △UA2S-GlcNAc                 | 0.73                | 0.65  | 0.53  | 0.63  | 0.51  | 0.47  | 0.56  | 0.62  | 0.71  | 0.61  | 0.61  | 0.69  | 0.68  | 0.70  | 0.48  |
| △UA-GlcNAc6S                 | 12.73               | 13.64 | 14.32 | 13.56 | 15.85 | 16.55 | 16.88 | 13.86 | 11.17 | 12.93 | 13.55 | 13.98 | 13.87 | 14.03 | 15.43 |
| △UA2S-GlcNAc6S               | 0.06                | 0.07  | 0.07  | 0.00  | 0.06  | 0.08  | 0.06  | 0.09  | 0.05  | 0.07  | 0.08  | 0.08  | 0.09  | 0.05  | 0.06  |
| △UA-GlcNS                    | 13.96               | 15.44 | 16.06 | 16.82 | 16.53 | 16.47 | 16.75 | 14.92 | 14.42 | 16.61 | 15.39 | 16.44 | 16.77 | 17.85 | 16.75 |
| △UA2S-GlcNS                  | 3.72                | 3.32  | 3.46  | 3.16  | 4.38  | 3.83  | 4.20  | 4.16  | 3.50  | 3.20  | 3.29  | 3.69  | 3.49  | 3.42  | 2.94  |
| △UA-GlcNS6S                  | 7.38                | 7.72  | 8.46  | 7.41  | 10.68 | 10.15 | 11.04 | 10.32 | 6.50  | 7.35  | 7.50  | 7.83  | 7.57  | 7.94  | 9.60  |
| △UA2S-GlcNS6S                | 4.90                | 5.34  | 4.46  | 4.25  | 7.05  | 6.71  | 5.96  | 6.38  | 3.96  | 4.08  | 4.82  | 4.99  | 4.60  | 5.08  | 4.92  |
| △UA-GlcNAc6S-GlcA-GlcNS3S6S  | 0.11                | 0.14  | 0.13  | 0.18  | 0.17  | 0.08  | 0.13  | 0.13  | 0.10  | 0.14  | 0.15  | 0.15  | 0.00  | 0.00  | 0.00  |
| △UA-GlcNS6S-GlcA-GlcNS3S6S   | 0.79                | 1.08  | 0.87  | 0.81  | 0.00  | 0.00  | 0.06  | 0.09  | 0.86  | 0.95  | 0.69  | 1.00  | 0.94  | 0.80  | 0.66  |
| △UA-GlcNS6S-IdoA2S-GlcNS3S6S | 4.34                | 3.25  | 3.86  | 2.80  | 0.00  | 0.00  | 0.00  | 0.00  | 3.61  | 5.38  | 2.99  | 2.76  | 2.98  | 3.62  | 2.88  |
| △UA-GlcNS-IdoA2S-GlcNS3S     | 1.75                | 2.02  | 1.60  | 1.72  | 0.06  | 0.08  | 0.06  | 0.09  | 1.42  | 1.97  | 1.61  | 2.23  | 1.70  | 1.66  | 1.92  |
| △UA2S-GlcNS-IdoA2S-GlcNS3S   | 0.34                | 0.36  | 0.33  | 0.36  | 0.11  | 0.08  | 0.13  | 0.13  | 0.41  | 0.34  | 0.23  | 0.31  | 0.34  | 0.35  | 0.30  |

Note: A group: HS3-OST-3a1 and 3b1 WT; B group: HS3-OST-3a1 and 3b1 DKO; C group: HS3-OST-1 WT; F group: HS3-OST-1 KO

**Supplementary Table S16. HS analysis from MLE cells and HCT-116<sup>a</sup>**

| Abbreviation    | Di/tetra-saccharides                 | Amount (ng/ $\times 10^6$ cells) |         |
|-----------------|--------------------------------------|----------------------------------|---------|
|                 |                                      | MLEC                             | HCT-116 |
| $\Delta$ IVA    | $\Delta$ UA-GlcNAc                   | 156.9                            | 40.1    |
| $\Delta$ IIIA   | $\Delta$ UA2S-GlcNAc                 | 9.4                              | 0.5     |
| $\Delta$ IIA    | $\Delta$ UA-GlcNAc6S                 | 12.7                             | 8.9     |
| $\Delta$ IA     | $\Delta$ UA2S-GlcNAc6S               | 1.6                              | 0.1     |
| $\Delta$ IVS    | $\Delta$ UA-GlcNS                    | 60.7                             | 34.8    |
| $\Delta$ IIIS   | $\Delta$ UA2S-GlcNS                  | 14.0                             | 3.0     |
| $\Delta$ IIS    | $\Delta$ UA-GlcNS6S                  | 11.2                             | 6.9     |
| $\Delta$ IS     | $\Delta$ UA2S-GlcNS6S                | 5.2                              | 3.7     |
| Tetra-1         | $\Delta$ UA-GlcNAc6S-GlcA-GlcNS3S6S  | 0.7                              | 2.6     |
| Tetra-2         | $\Delta$ UA-GlcNS6S-GlcA-GlcNS3S6S   | 0.0                              | 1.2     |
| Tetra-3         | $\Delta$ UA-GlcNS6S-IdoA2S-GlcNS3S6S | 0.0                              | 0.0     |
| Tetra-4         | $\Delta$ UA-GlcNS-IdoA2S-GlcNS3S     | 0.1                              | 1.5     |
| Tetra-5         | $\Delta$ UA2S-GlcNS-IdoA2S-GlcNS3S   | 0.1                              | 1.6     |
| Total HS amount |                                      | 272.4                            | 104.7   |

a. The data for HCT-116 taken from the publication by Ferreira and colleagues<sup>26</sup>. The data for HCT-116 was presented in ng/mg of protein in the paper. We converted to ng/ $\times 10^6$  cells provided that 0.9 mg of protein was from  $10^6 \times$  cells.
